# Supplementary material for: The Impact of Motherhood on Women’s Career Progression: A Scoping Review of Evidence-Based Interventions
Source: Behav Sci (Basel). 2024 Mar 26;14(4):275. doi: 10.3390/bs14040275 (PMC11047346; doi:10.3390/bs14040275)
Supplement: Supplementary file 1 [file behavsci-14-00275-s001.zip › Supplementary material.xlsx]

## Sheet: Categorization
N	Title	Reference	Year	Nationality of the 1st author	Journal	Journal origin	Aim	Research questions or hypotheses	Theoric model	Type of Study	Research design	Data collection method	Sample	Context	Area	Instrument	Intervention	Themes/coding of interviews	Results (main findings related to the impact of motherhood on advancement)	Discussion	Facilitators	Barriers	Insights for intervention focused on mothers’ career advancement
1	Academic mothers, professional identity and COVID-19: Feminist reflections on career cycles, progression and practice	Bowyer, D., Deitz, M., Jamison, A., Taylor, C. E., Gyengesi, E., Ross, J., ... & Dune, T. (2022). Academic mothers, professional identity and COVID‐19: Feminist reflections on career cycles, progression and practice. Gender, Work & Organization, 29(1), 309-341. https://doi.org/10.1111/gwao.12750	2021	Australia	Gender, Work & Organization	United Kingdom	Our methodological aim is to put into practice feminist scholarship that champions women's personal experience – or auto-ethnography more broadly – as a legitimate mode of intellectual inquiry, as well as one that can make new meaning and produce original knowledge (Collins, 2000; Ellis & Bochner, 2000). As Gannon et al. (2015) note, the use of personal narratives in understanding the career path…	Not reported	Feminist theory	Qualitative	Longitudinal	Interview	6 academic mothers	Academy	No distinction	-a data collection document was created by authors Dorothea Bow-yer (DB) and Anne Jamison (AJ), topics were generated from the pre-COVID concepts. - First, au-thors DB, AJ, CT, TD, MD, and EG each filled in the narrative data collection document independently. The pre-COV-ID-19 data collection document took between 60 and 90 min to complete over September and October 2019. After completing the do…	Not reported	STEP 1: Present the evidence in a tabulated manner. Reflect and write in a non-academic manner about “what it is and what it takes to rebuild Professional Identity” post career break.STEP 2: Create one narrative per person (written in a descriptive – or if you prefer emotive – format, rather than an academic format) that answers(1) What do we see as professional identity? Post career break what m…	- It was very quickly apparent through our narratives, however, that our sense of control over how we were perceived professionally, as well as our ability to maintain and control our career pathways were significantly challenged as we tried to navigate being mothers and academics upon returning to work; - As a result of these internal and external changes to the ways we experienced our professio…	Our project, firstly, exposed how professional identity is challenged by often preconceived and gender-biased assumptions about motherhood, career breaks, and female academics more generally. Reintegrating into our work environments after the birth of our children made us question our roles as academics and exposed a lack of collegial and institutional support in securing a sense of belonging in …	Empathetic colleagues were a significant component to our ability to feel supported at work and to re-engage in our academic tasks; Institutional policy and practices (The Phased Return program,University's Career Interruption Grant); Balance was also facilitated by adopting different strategies to support the co-existence of our work and life identities.	Some team leaders seemed to challenge our professional identity and our aims to re-establish career momentum; Finding balance between motherhood and academia;	- how such practices might serve as a broader model both for rethinking what it means to be productive as an academic, as well as building a more sustainable and resilient foundation upon which to forge our future gender equity strategies.
2	Attaining full professor: Women's and men's experiences in medical education.	Varpio, L., Harvey, E., Jaarsma, D., Dudek, N., Hay, M., Day, K., . . . Cleland, J. (2021). Attaining full professor: Women’s and men’s experiences in medical education. Medical Education, 55(5), 582-594. https://doi-org.ez34.periodicos.capes.gov.br/10.1111/medu.14392	2021	USA	Medical Education	UK	An international qualitative investigation of the experiences of women and men is needed to help us understand why women remain underrepresented in the highest professorial ranks of medical education. This can in turn help us generate better informed solutions for addressing that inequity. To achieve this objective, our study explored women and men's experiences of the pathway to full professorsh…	Not reported	Feminist theory	Qualitative	Cross-sectional	Interview	n = 15 females and n = 9 males	Academy	Medicine	narrative analysis. First, we drew on our personal networks to identify participants. Second, we reviewed the authors of publications in Academic Medicine, Medical Teacher and Medical Education in 2018, adding names to the lists when authors met our inclusion criteria.	- (a) acknowledging where and how patriarchal ways of thinking are shaping promotion policies and practices; and (b) actively working to change those ways of thinking. The findings from our research suggest places where these actions can start as follows: recognise parenting as a challenge that both men and women face personally and professionally, and support all parents in navigating that chall…	After asking demographic questions (eg What year did you become a full professor?), the research assistant (RA) asked the participant to 'tell me the story of how you became a full professor?' Only after the participant had shared their full narrative did the RA ask probing questions encouraging descriptions of (a) the professional (eg mentoring), structural or institutional (eg local systems) or…	All participants self-identified as being of the dominant ethnic group in their respective countries. Of the fifteen female participants, four were MD-trained, nine were PhD-trained, and two were both MD- and PhD-trained. Of the nine male participants, five were MDtrained and four were PhD-trained. From the perspective of personal events, 23 of the 24 study participants were married while working…	- By studying the narratives of both female and male faculty members from five different countries who have achieved full professor status in medical education, we found that the personal events, career milestones and facilitating or impeding factors impacting their ability to obtain full professor status were similar for all participants. However, our participants’ narratives revealed that the e…	- mentorship	- work family conflict - traditions that could not be overturned; - expectations based on track records and timelines that did not reflect women's experiences; - and cultures that aligned with specific social expectations.	Not reported
3	Breadwinner Bonus and Caregiver Penalty in Workplace Rewards for Men and Women	Bear, J. B., & Glick, P. (2017). Breadwinner bonus and caregiver penalty in workplace rewards for men and women. Social Psychological and Personality Science, 8(7), 780-788. https://doi.org/10.1177/1948550616683016	2017	USA	Social Psychological and Personality Science	USA	Study 1 tested whether family role assumptions about mothers and fathers predict workplace incentive discrimination. Study 2 explicitly manipulated family role information to see whether roles, not parent gender, explain discrimination. Can family role information overcome the motherhood penalty to the point that mothers (like fathers) receive a breadwinner bonus if labeled the main family provid…	We argue that the motherhood penalty and fatherhood bonus are better described as a caregiver penalty and breadwinner bonus toward people of either gender based on family roles. Can family role information overcome the motherhood penalty to the point that mothers (like fathers) receive a breadwinner bonus if labeled the main family provider? Study 1- Hypothesis 1: Perceivers assume that fathers (…	Social role theory	Quantitative	Longitudinal	Survey	Study 1 - 475 (38% women; MAge ¼ 33.5, SDAge ¼ 10.27). Study 2 - 482 (45% women; MAge ¼ 34.29, SDAge ¼ 11.27)	Organization	No distinction	Study 1 -Salary offer. Participants indicated an offer on a sliding scale from US$55,000 to US$70,000. Flexible schedule offer. Participants rated the likelihood of offering flexible schedule on a 1 (not at all likely) to 7 (very likely) scale. Candidate’s family role. On a 1 (strongly disagree) to 7 (strongly agree) scale, participants rated 4 items about the candidate’s family role, that is, ‘‘…	-when family roles were not specified, fathers (assumed breadwinners) received higher salary offers than mothers (assumed caregivers). Study 2 showed how this penalty can be erased: A breadwinning mother was offered a higher salary and was more likely to be offered leadership training than mothers labeled as caregivers or with unspecified family roles. -Study 2 also showed that characterizing a f…	Not reported	Study 1 - Consistent with Hypothesis 1, participants rated the male candidate as significantly more likely to be the primary breadwinner and not the family caregiver ) than the female candidate . Thus, Hypothesis 1 was supported. , supporting Hypothesis 2a, mothers received lower salary offers than fathers and, supporting Hypothesis 3a, perceived family role moderated this effect. Moderation was …	Evidence from two studies supports the notion that the fatherhood bonus may be better understood as a breadwinner bonus that can apply to mothers as well as fathers, whereas the caregiver penalty remained gendered, occurring for mothers but not fathers.In the current research, however, mothers, but not fathers, were penalized for caregiving. Whereas breadwinning trumped gender, the caregiving rol…	Mothers who claim breadwinner status can reduce financial discrimination as well as increase leadership opportunities. Overall, breadwinner status improved women’s financial and leadership outcomes, whereas caregiver status generally did not harm men, though male caregivers were offered lower salaries than male parents with an unspecified family role.	Barreira contextual: female breadwinners in the United States are often single mothers with lower socioeconomic status (Wang et al., 2013) who may face additional race and classbased discrimination	Not reported
4	Can Online MBA Programmes Allow Professional Working Mothers to Balance Work, Family, and Career Progression? A Case Study in China	Kibelloh, M., & Bao, Y. (2014). Can online MBA programmes allow professional working mothers to balance work, family, and career progression? A case study in China. The Asia-Pacific Education Researcher, 23, 249-259. https://doi.org/10.1007/s40299-013-0101-1	2014	China	The Asia-Pacific Education Researcher	Singapore	This research aims to examine online MBA programme adoption intentions in China from a technology acceptance perspective	This study aims to answer the following research questions (RQs): RQ1: What are Chinese professional women’s experiences with work–family conflict and career aspirations? General Concern of Professional Working Mothers in China 251 123 RQ2: What is the perceived usefulness of an online MBA programme in terms of balancing work–family demands and career aspirations? RQ3: What is the perception of e…	Technology acceptance model (TAM)	Qualitative	Cross-sectional	Interview	10 female professional part-time MBA students.(working mothers)	Academia	No distinction	In-depth face-to-face interviews were conducted in. Demographic data including age, marital status, and education and career background; patterns of career progression; and availability of home and child support were first collected using semi-structured interviews. Next, the interviewer asked three open-ended questions concerning the informant’s perception of the experiences of work–family confl…	- findings emphasise the importance of building reputable online learning brands to counteract the fears surrounding quality issues in China. Chinese business schools should consider seeking e-learning accreditation and certifications to further enhance the perceived trust of e-learning as benchmarked by famous and reliable online higher education brands, such as Harvard and MIT.	1- Work–Family Conflict and Career Aspiration Experiences 2- Perceived Improvement in Job Prospects with an MBA 3- Women’s Perceptions of the Usefulness of Online (flexibility, abundant information) MBA Programmes 4- Perceived Limitations of Online MBA Programmes 5- Women’s Perceptions of the Ease of Use of E-Learning 6- Opinions of the Quality of Online MBA Programmes	- Many women indicated that work demands and a desire to reach top management levels often required them to focus more on the job than family, at least in the very beginning of employment. Competing with work demands is the importance of investing in childcare and raising children. Consequently, managing work, family, and studies was observed to impact women’s physical well-being, leaving them ti…	RQ1: working mothers risk minimising their social responsibilities when stretching their roles, which in turn affects their prospects of progressing their careers. Nonetheless, undertaking an MBA programme may help these women develop skills to progress their careers. RQ2: Online MBA programmes are vital in allowing women to balance work–family demands with career aspirations providing the necess…	- online MBA (work-family balance)	- networking, motivacion, quality of information.	Not reported
5	Challenges of work-life balance for women physicians/mothers working in leadership positions	Schueller-Weidekamm, C., & Kautzky-Willer, A. (2012). Challenges of work–life balance for women physicians/mothers working in leadership positions. Gender medicine, 9(4), 244-250. https://doi.org/10.1016/j.genm.2012.04.002	2012	Austria	Gender medicine	USA	The aim of this study was, first, to perform a strengths, weakness, opportunities, and threats (SWOT) analysis and, second, to create a strategic concept for career development.	Not reported	Not reported	Mixed-methods	Cross-sectional	Survey	women in leadership positions in the health care system in Vienna, Austria, with at least 1 child (n = 8).A leadership position was defined as the head of a department or head of a university or public hospital. The women had at least 1 child but not more than 2 children. At the time when women achieved their leadership positions, 6 of 8 had children 10 years old.	Organization	Medicine	questionnaire-related interviews with women in leadership positions and developed an analysis to evaluate the strengths, weaknesses, opportunities, and threats (SWOT) concerning work– life balance and career development.	strategic concept was created for career development for women in medicine. The strategic concept for career development is based on the answers to the questionnaire based on the SWOT analysis. At the beginning of a career, women should definitely be aware of the first step in climbing the career ladder and facing all the obstacles. The presence of role models, especially women who have achieved …	1. Why did you decide on a career? 2. Did you plan a path of career development at the beginning of your medical education? 3. Which barriers confronted you on your way to the top? 4. What are your personal strengths that you could use for your career? 5. Were there any obstacles to your career development due to your sex? 6. Which skills do you lack compared with your male colleagues? 7. What wa…	Two women reported that the advice of their mentor or partner encouraged them to apply for a leadership position. - All of the interviewed women stated that the desire to achieve a leadership position did not exist at the beginning of their career. - Children were cited as the most important obstacle on the way to the top (n = 6). Family life, child care, and child education were time-consuming a…	The initial expectations for career advancement were lower for women than for men at baseline, but significantly higher after institutional intervention and associated with higher rates of promotion, as shown in a study by Fried et al.14 These results were confirmed in our study, in which all of the interviewed women stated that they were uncertain about their career path upon entry into their me…	Courage and self-confidence would guide entry into a career and help negotiate the negative comments of people. Persistence and consequent pursuing personal ambitions should be in the forefront. Time management, strategic planning, networking, authenticity, and an awareness of being a woman are important factors that aid in achieving a top position while maintaining a good work–life balance. To a…	- stiky floor; gless ceiling;	- establishing reliable, accessible, and supervised child care, including checking of the kindergarten teacher’s competence.
6	Children and the gender gap in management	Hardoy, I., Schøne, P., & Østbakken, K. M. (2017). Children and the gender gap in management. Labour Economics, 47, 124-137. https://doi.org/10.1016/j.labeco.2017.05.009	2017	Norway	Labour Economics	Netherlands	Our argument is that the arrival of the first child will partly determine the relative share of domestic obligations between the parents and will thereby potentially have short and longlasting effects on the couple's division of time, both domestically and in the labour market. The main mechanism we wish to capture is the impact of human capital depreciation and the lack of skill accumulation ari…	The question we ask in this paper is how important children are to the sustained gender gap in management positions. - The crucial identification assumption in our approach is that the decision of the timing of the firstborn is not affected by an expected change in the perceived promotion or career trajectory in the absence of a child.	Not reported	Quantitative	Longitudinal	Survey	8 cohorts of couples who gave birth to their firstborn in one of the years 2005–2012. Couples are matched in the year they become parents (t = 0). We follow these cohorts from two years before birth (t = –2) up to nine years after birth (t = 9), i.e. the data covers the period 2003–2014.1	Organization	No distinction	We exploit high-quality register data covering the whole population in Norway, enabling us to link couples with a common offspring. The unit of observation is the couple. We follow the spouses from two years before to nine years after the first child is born. The data is collected and organised by Statistics Norway and covers all individuals residing in Norway.	Not reported	Not reported	The main result is that the within-couple gender gap in management increases as a consequence of the arrival of the firstborn. In the period preceding the firstborn, the difference is small. The gap then widens in the period after childbirth. Nine years after birth, the gap is widened by approximately 5 percentage points. The gender management gap increases after the firstborn such that after nin…	In this paper, we look at the importance of parenthood for the gender gap in management, in an environment typically characterised as having a generous public family policy. Parenthood involves more domestic obligations for the spouses/partners. If the major share of these obligations falls on the mother, her use of less time and effort in the labour market may imply an increased gender gap in th…	parental leave	Blau and Kahn (2013) suggest that generous public family policies such as those in the Scandinavian countries, including entitlements to long and fully wage-compensated parental leave and the entitlement to subsequent part-time work, may encourage women who would otherwise have had a stronger labour force commitment to take part-time jobs or lower-level positions in the workplace. This may be det…	Not reported
7	Do Mother and Father Auditors Have Equal Prospects for Career Advancement?	Kristensen, R., Kent, P., Warming-Rasmussen, B., & Windsor, C. (2017). Do Mother and Father Auditors Have Equal Prospects for Career Advancement? International Journal of Auditing, 21(1), 1-10. https://doi-org.ez34.periodicos.capes.gov.br/10.1111/ijau.12074	2017	Denmark	International Journal of Auditing	UK	We examine whether mothers and fathers have equal prospects for career advancement in large audit firms in Denmark. However, it is possible that the social aim of gender egalitarianism in Denmark is symbolic and not achieved in practical outcomes. We provide evidence on the issue of gender egalitarianism defined as the societal institutionalization of gender equality for large accounting firms in…	H1: Mothers are less likely to be promoted to senior management levels than fathers in large accounting firms in Denmark.	Social cultural theories; Gender egalitarian theory	Quantitative	Cross-sectional	Survey	195 auditors employed by international globally franchised auditing firms male and female who have similar professional and tertiary educational profiles	Organization	Accounting	Data were collected using a survey of audit staff of the five largest accounting firms in Copenhagen, Denmark. The questionnaire requested demographic information of the respondents: gender, parental role, number of years in audit, age, educational qualification and marital/cohabitation status.	Not reported	Not reported	- The number of female candidates passing the StateAuthorized Public Accountants exam is much lower than the number of male candidates. - correlations between female and CPA educational level in the separate subsamples of parents and non-parents are not significant. - traditional gender ideology is more pervasive in the audit firms under investigation than modern gender egalitarianism. - The resu…	The number of female candidates passing the StateAuthorized Public Accountants exam is much lower than the number of male candidates. This could indicate that mothers are less likely to be promoted to owner/partner and employed certified public accountant because mothers do not choose to sit the exam and this qualification is necessary for advancement to these levels. The government and professio…	Not reported	We add to earlier research that indicates that culture is hard to change in accounting firms, leading to organizational barriers to female career advancement in the accountancy profession. A source of this barrier is associated with the assumption that women are the primary care givers for couples with children. There is an importance of examining parenthood for men and women and find males are p…	Not reported
8	Economic crisis and women's labor force return after childbirth: Evidence from South Korea	Ma, L. (2014). Economic crisis and women’s labor force return after childbirth: Evidence from South Korea. Demographic Research, 31, 511-552. https://www.jstor.org/stable/26350072	2014	Sweden	Demographic Research	Germany	This study examines how women’s labor force return after childbirth (with and without career interruption) and their career prospects upon work return varied before, during, and after the Asian financial crisis in South Korea.	1. What are the possible driving forces of Korean women’s labor force return after childbirth? 2. How does women’s labor force return after childbirth vary across business cycles? 3. How do women’s career prospects vary by the length of time out and across business cycles?	Not reported	Qualitative	Longitudinal	Interview	1,790 women	Organization	No distinction	The data used for analyses are from waves 1 to 10 of the Korea Labor and Income Panel Study (KLIPS), Korea’s only labor-related panel survey, initiated by the Korea Labor Institute.	Not reported	In the first stage I apply a logistic regression model to the whole sample to capture how human capital accumulation, family policy change, business cycles, and financial needs may have been associated with mothers remaining in employment without any reported career interruption after the birth of their first child. - In the second stage I apply event-history analysis (hazard regression) to the s…	Immediate work return without career interruption - The results from the immediate return model (first stage analysis) show an upward trend of women’s immediate return without career interruption from the 1980s to the late 1990s. During the crisis period (1998-2001) when the labor market was restructured and the risk of being laid off was high, new mothers held onto their role in the labor force …	These results can be understood from various perspectives, among which two can be pointed out. First, in unstable economic conditions women were so desperate to get a paid job that they did not care about the job’s occupational prestige. Any paid job during such a critical time meant that the family was less exposed to the risk of social insecurity. Second, the overall labor market restructuring …	economic conditions (the more there is a crisis, the more likely mothers are to get/need work). - Maternity leave: a booster for women’s return to work. - temporary jobs during the crisis	Not reported	Not reported
9	Entitled to a Sustainable Career? Motherhood in Science, Engineering, and Technology.	Herman, C., & Lewis, S. (2012). Entitled to a sustainable career? Motherhood in science, engineering, and technology. Journal of Social Issues, 68(4), 767-789. https://doi.org/10.1111/j.1540-4560.2012.01775.x	2012	UK	Journal of Social Issues	UK	(1) To examine the ways in which mothers (and some fathers) talk about decisions concerning working hours at the transition to parenthood. We explore (a) how SET professionals define their situations in terms of their perceived sense of entitlement to modify work for family and at the same time develop sustainable careers, and (b) how perceptions of national contexts, including social policy and …	Not reported	Gendered organizational theory; Social comparison theory	Qualitative	Cross-sectional	Interview	38 pessoas (8 homens e 30 mulheres)	Organization	STEM	The interviews lasted about 1 hour and were recorded, transcribed, and translated as appropriate. Most interviews were conducted in English although some were carried out in French. In this article, we analyze the experiences of 30 mothers in three countries, as well as eight men from two French companies	Not reported	A coding scheme was developed between the two authors with general headings. These included professional identity (career history, ambitions and aspirations, work patterns) discourses of expectations and choice, organizational culture (progression/stagnation, attitude to motherhood, gender biases, ideal workers, flexible work options, leave arrangements, in/visibility paradox), motherhood (mother…	Working Hours, Sense of Entitlement, and National Context: Despite differences in national normative and policy contexts and childcare support, few of the women interviewed appeared to have a strong sense of entitlement to work shorter hours without giving something back in exchange; working harder or forfeiting career progression. Given the pervasive ideology of ideal SET careers with constant a…	- The findings show that career decisions after becoming a mother, and sense of entitlement to support for career and family roles, are strongly influenced by intersecting layers of national and workplace policy and normative context that shape what individual mothers perceive to be normative, feasible, and acceptable. Entitlements and Norms Shaping Career Decisions: we demonstrate that scientist…	awareness of how this is culturally constructed offers the possibility for social comparisons and change; - The national cultural context provided a counterbalance to the predominant organizational culture. - management support (flexibility in working hours); - availability of services childcare; - part-time or reduced-hour work is available and normative - support and encouragement from manageme…	absence of senior female role models (social comparators become their male colleagues); contextual factors: nature of work (reducing working hours were somewhat easier in administrative or laboratory jobs than in roles that required frequent trips abroad);	Not reported
10	Family Duties and Job Flexibility: Tradeoffs for Chinese Urban, Educated Mothers with Toddlers	Kim, S., Zhang, C., Yoshikawa, H., Fong, V.L., Way, N., Chen, X., ... Ke, X. (2022). Family Duties and Job Flexibility: Tradeoffs for Chinese Urban, Educated Mothers with Toddlers. Journal of Comparative Family Studies 53(1), 25-47. https://www.muse.jhu.edu/article/852702	2022	South Korea	Journal of Comparative Family Studies	Canada	In this study, we thus set out to explore how urban Chinese women working across various sectors perceive their options, and how this plays into the ways in which they seek work-family balance after the birth of their first child.	In this paper, we link young mothers’ choices of firm types and work trajectories with their family life. We explore how mothers across different job trajectories experience work and manage their family responsibilities. We distinguish mothers’ preferences from their choices and how they deal with potential work-family conflict in urban China, where a majority of mothers continue working after ch…	Not reported	Mixed-methods	Longitudinal	Survey and interview	371 mothers	Organization	No distinction	In 2006, 440 couples with newborns were recruited from a large public city hospital in central Nanjing, of which 428 responded. A survey was administered to these parents of infants at six months, and our participants were followed up when the infants were 14 months, 24 months, and 48 months old. This study uses the baseline survey at 6 months (N = 428) and the second wave survey at 14 months ask…	Not reported	Job characteristics: Mothers were asked a battery of questions about their last six jobs leading to their most recent or current job. 84.28% of the mothers in our sample were still working when their children were 14 months, but all mothers worked at some point even if they were not working at 14 months, so they were included in our analyses.	- We showed that the four groups not only demonstrated mothers’ different job pathways and career choices but also their different strategies of balancing work and childrearing responsibilities. In particular, we illustrated how the high-stability trajectory offered unique opportunities for young mothers to manage work-family balance but also led to experiences of more negative work climates than…	- diferença de empresas estatais e privadas: Despite the advantages offered by SOEs, high-stability mothers were equally aware of their disadvantages. Many pointed to the lack of individual performance-based raises; an internal focus on standardized rules, policies and structures in SOEs led to routinized job content with little room for exercising autonomy. With the goal of pursuing a job that w…	- public sector: stability, low stress and few responsibilities	- public sector: many felt "trapped"	Not reported
11	Gender Disparities in Active Duty Air Force Parents’ Childcare Access: Pre-Pandemic Costs, Utilization, and Career Impacts.	King, E. L., Myint, H., Gardner, T. R., Mitchell, M. R., & Beitz, K. A. (2023). Gender Disparities in Active Duty Air Force Parents’ Childcare Access: Pre-Pandemic Costs, Utilization, and Career Impacts. Armed Forces & Society, 49(3), 776-797.	2023	EUA	Armed Forces & Society	EUA	As a pre-pandemic understanding is needed to enable future study of the pandemic’s effects and may be useful in measuring effects of policy changes, this paper sought to uncover the pre-pandemic state of military members’ childcare by gender. Specifically, this paper examines gender differences in active duty Air Force parents’ childcare access, cost, and utilization, as well as members’ percepti…	Not reported	Not reported	Quantitative	Longitudinal	Survey	1- N = 19.908 (16,080 (80.8%) respondents were men and 3,828 were women (19.2%)) 2 - N= 26.024 (66.4% (17,274) were men and 33.6% (8,750) were women)	Organization	Military	Frist: The AF Community Feedback Tool (CFT; Department of the Air Force, 2017) was used to examine gender differences across rank groups in past year difficulties obtaining childcare. Survey participants clicked a link and entered a unique code to access their survey, which collected demographics and information regarding community problems and needs, available supports, and respondents’ utilizat…	Not reported	Not reported	- Over 19% of all active duty respondents with children under 13 years old (N =19,908) reported problems accessing quality childcare in the previous year. The percentage of women endorsing childcare access problems was nearly double the percentage of men (30.3% compared to 16.7%), representing an 81% gender gap. - Rank groups endorsing access problems also differed by gender. - Statistically sign…	Findings highlight that, despite seemingly gender-neutral DoD childcare policies and programs, active duty women report more difficulties obtaining sufficient childcare and face greater career impacts from childcare than men. DoD childcare deficits and their impacts on servicewomen’s careers underscore how the military institution’s greediness is amplified for women in part through its support sy…	- likely financial (affordable), resource (childcare options), and demand (work hours) differences	- different family structures (single-parent families); - minor children;	Still, as efforts to improve the DoD childcare system have continued over 30 years, it is reasonable to question the speed and degree to which new efforts will resolve persisting challenges, particularly for women.
12	Gender inequalities in occupational prestige across the working life: An analysis of the careers of West Germans and Swedes born from the 1920s to the 1970s	Härkönen, J., Manzoni, A., & Bihagen, E. (2016). Gender inequalities in occupational prestige across the working life: An analysis of the careers of West Germans and Swedes born from the 1920s to the 1970s. Advances in Life Course Research, 29, 41-51. https://doi.org/10.1016/j.alcr.2016.01.001	2016	Sweden	Advances in Life Course Research	Netherlands	The objective of this study is to analyze gender differences in occupational careers and how they have developed over birth cohorts born from the 1920s to the 1970s in Sweden and West Germany. By focusing on permanence and change in inequalities over the life course, the analysis of careers offers a more appropriate perspective on occupational stratification than snapshot measures of inequality—s…	First, we are interested in how occupational gender inequalities develop over careers, from labour market entry onwards. Second, we ask whether gender inequalities in educational attainment account for inequalities in occupational careers. Educational expansion was particularly strong among women during the studied period: how does this translate into occupational gender inequalities? Our third q…	Not reported	Quantitative	Cross-sectional	Survey	7951 West Germans and 5023 Swedes	Organization	No distinction	growth-curve analysis (GCA); German Life History Study (GLHS) and the Swedish Level of Living Surveys (LNU) - We analyze occupational histories of 7951 West Germans and 5023 Swedes born in three cohorts, from around the 1920s to the early 1940s, the late 1940s to the early 1960s, and from the early 1960s to the 1970s. We measured occupational attainment using the Treiman occupational prestige sca…	Not reported	Not reported	- The second model controlled for educational attainment, class background, as well as the number of children and its interaction with gender. These controls explained a part of the gender difference at labour market entry in the oldest and the youngest German cohorts, and the entire gap in the middle cohort. In the oldest cohort, all the interactions between gender and the work experience spline…	- Our first research question concerned the shape of gender inequality in occupational prestige over the career; we asked whether gender inequalities are cemented already at labour market entry, or whether they are shaped by differential rates of career progression. The results showed that for the most part, gender inequalities in occupational prestige are more stable over the career in West Germ…	- occupational prestige in the youngest cohort.	The higher degree of career stability in Germany is in line with other occupational mobility research, which reports that the strict occupational boundaries and the high occupational specificity of German educational degrees limit the extent of occupational moves. This rigidity limits how much career developments can shape labour market inequalities, which tend to remain relatively stable after l…	Not reported
13	Gender, Race and Parenthood Impact Academic Productivity During the COVID-19 Pandemic: From Survey to Action	Staniscuaski, F., Kmetzsch, L., Soletti, R. C., Reichert, F., Zandonà, E., Ludwig, Z. M., ... & de Oliveira, L. (2021). Gender, race and parenthood impact academic productivity during the COVID-19 pandemic: from survey to action. Frontiers in psychology, 12, 663252.	2021	Brazil	Frontiers in psychology	Switzerland	The aim of this study was to investigate whether gender, race and parenthood are associated with academic productivity during the COVID19 pandemic.	Not reported	Not reported	Quantitative	Cross-sectional	Survey	3,345 scientists - the majority self-declared as White (75.9%), are women (68.4%) and are parents (70.7%).	Academy	No distinction	The questionnaire was specially developed to assess the impact of COVID-19 pandemic on the productivity of researchers of both genders with and without children. It consisted of 25 questions collecting information about the researchers’ demographics (country region, gender, and race), work setting (workplace closure, remote activities, online teaching) and children care (see a complete version of…	Not reported	Not reported	Manuscript Submissions During the Pandemic Period: Manuscript submission among male academics was less affected by the pandemic circumstances than that among women. There was a positive association between women with children and the non-submission of manuscripts. However, no association was observed for women without children. Additionally, the proportion of childless women who submitted manuscr…	- Our results for the Brazilian context echo those of studies based on the US context showing that working mothers, including those in academia, might be disproportionately affected by the COVID-19 crisis. This exacerbated disparity during the pandemic reflects the historical inequality between the careers of men and women. During the COVID-19 pandemic, several factors that have historically prom…	- maternity aid policies and actions (postponement of deadlines, financing agencies, scheduling flexibility) - evaluations of manuscripts for publication and career assessments must prioritize racial and gender equity - infrastructure for family service in academic spaces	- unbalanced division of household tasks. - stereotypes and unconscious biases - closure of schools and daycare centers - children under 6 years old - structural racism - lack of professional support network	Not reported
14	Gender, Work Time, and Care Responsibilities Among Faculty1.	Misra, J., Lundquist, J. H., & Templer, A. (2012). Gender, work time, and care responsibilities among faculty 1. Sociological Forum 27(2). 300-323. https://doi.org/10.1111/j.1573-7861.2012.01319.x	2012	EUA	Sociological Forum	EUA	In this article, we explore how faculty at one research-intensive university spend their time on research, teaching, mentoring, and service, as well as housework, childcare, care for elders, and other long-term care. Drawing on surveys and focus group interviews with faculty, we examine how gender is related to time spent on the different components of faculty work, as well as on housework and ca…	What explains these different outcomes? Do men allocate more time to the work that leads to jobs and promotion? Do caregivers make different decisions about time allocation?	Not reported	Mixed-methods	Cross-sectional	Survey and interview	349 professores (women and men compose 53% and 45% of the sample)	Academy	No distinction	The survey included time-use measures for professional and personal activities, with special attention to care-giving responsibilities broadly defined as time spent caring for children or elders or other long-term care. - In addition to the surveys, six focus group luncheons for faculty were held in April 2009. All lecturers, assistant, and associate professor faculty members were sent an e-mail …	Not reported	The focus groups discussed the challenges faced by faculty regarding work-life balance, and the types of programs, supports, or services that would be most helpful in navigating work-life balance.	- Faculty reported spending tremendously long hours on work, with a mean of 66.4 hours⁄week and a median of 65 hours⁄week. On average, faculty worked 12 hours each weekend. Our focus group participants expressed frustration with very long hours. Yet, it is not simply that it is difficult to leave work at the office; faculty also noted that their work hours crowded out the rest of their lives. - M…	Our results also support the commonly documented phenomenon that women faculty balance much higher loads of housework and care time than men. Yet despite spending less time on unpaid work, men do not appear to be working on the job for longer hours than women. One of our most compelling findings relates to the connection between motherhood and the sacrifices women make in the distribution of thei…	- policies at the university level could be introduced that would lead to greater gender and care-giver diversity among senior faculty, policies that can help faculty with high care demands remain engaged in research are crucial. - paid parental leave - service and teaching goals - affordable university-based childcare and eldercare - rethinking the valuation of research - develop models of how c…	- related to facilitators	Not reported
15	How parenthood contributes to gender gaps in academia	Zheng, X., Yuan, H., & Ni, C. (2022). How parenthood contributes to gender gaps in academia. Elife, 11. https://doi.org/10.7554/eLife.78909	2022	EUA	eLife	UK	pay attention relationship between partner support and the gender disparity in academia. This study examines the gender gaps in various measures of academic achievement (both objective and subjective), and how parenting-related work-family conflict and partner support mediate these gaps.	Not reported	Not reported	Quantitative	Cross-sectional	Survey	7,764 academics (4,425 (57.0%) women, 3,311 (42.7%) men, and 28 respondents (0.4%) who selfidentified as non-binary) - the parent group (n=5,670, 73.3%) and non-parent (n=1,534, 19.8%) group	Academy	No distinction	Using data from the Web of Science and responses from 7,764 academics in the United States and Canada to a survey distributed in 2019. We use bibliometric indicators of scientific productivity, citation, and collaboration to measure objective career achievements. Subjective career achievements are one’s subjective feelings of career attainments, including self-reported research satisfaction, care…	Not reported	Not reported	Parenthood and its overall compatibility with academic careers: Our results further show that the gender difference in parenthood status of academics is highly related to career considerations: For those with children, women are more likely than men to report that the number of children they have is related to career considerations. Among those without children, women (59.9%) are more likely than…	- The perceived negative impact of parenting could intensify gender inequalities, as previous research found it was one of the major systemic barriers pushing women to self-select away from academia, contributing to the academic “leaky pipeline”. On the other hand, we found that women are less likely than men to have children and have fewer children. - Given the role of productivity in the academ…	- partner support - Reducing mothers’ work-family conflict	- shortened working time and limited decision support for more work engagement restrict mothers’ opportunities for networking and academic collaboration. - The limited general support from partners thus may hurt the research productivity of mothers directly or indirectly by constraining research collaborations, which usually leads to higher productivity. - higher levels of work-family conflict ex…	Not reported
16	I Left Venus and Came Back to Mars: Temporal Focus Congruence in Dyadic Relationships Following Maternity Leave	Freeney, Y., van der Werff, L., & Collings, D. G. (2022). I left Venus and came back to Mars: Temporal focus congruence in dyadic relationships following maternity leave. Organization Science, 33(5), 1773-1793.	2022	Ireland	Organization Science	USA	Our qualitative research set out to understand how women navigate the disruption of work and career on their return to work after the interruption of maternity leave.	We explore how returners, and their line managers navigate the temporal disruption inherent to maternity leave and the role that temporal focus (in)congruence plays in that process. In particular, we consider the implications of temporal focus (in)congruence for the dyadic relationship between a returner and her manager and for the returner’s career.	Temporal focus	Qualitative	Longitudinal	Interview	27 organizations we set out to interview a high potential woman who returned to work in the previous six months; her line manager; and the HR Director or HR senior manager. (54 interviews)	Organization	No distinction	Firstly, we used nondirective questions focused on events to gather specific information . Specifically, we asked informants to describe significant events that they had experienced prior to, during and after the maternity leave and to work through those experience chronologically.	Not reported	Firstly, we transcribed each of our interviews verbatim and summarized sections of the data into key words. We initially focused on individual interviews, then for both interviews in each dyad, and finally across the dyads. This initial ‘open coding’ resulted in a plethora of ‘first order codes’. These in vivo codes were based on the terminology used by interviewees, such as ‘adjustment’; ‘transi…	Our findings show that congruent temporal focus across dyadic partners yields more positive outcomes, while incongruence inhibits effective resocialization. In particular, a broad congruent temporal focus that takes account of past, present and future contributions to work has the more potential for positive career and relational outcomes. Our findings reframe temporal focus as a relational conce…	In this research, we consider how temporal focus is influential at a relational level and how temporal focus (mis)matches between a manager and employee might impact on relational and career outcomes. We drew on maternity leave as a phenomenological temporal disruption to explore the temporal dynamics at play within a significant workplace relationship and to understand how resocialization may be…	- considered the period of leave to be beneficial for their careers, facilitated by a broader temporal focus; - sometimes returning to work helps relationships with managers	- the impact of returning to work is directly related to career problems (temporal disruption); - loss of confidence of managers after return; - feeling that after returning, the woman would put her own interests above the interests of managers and the organization;	Not reported
17	Informality, emotion and gendered career paths: The hidden toll of maternity leave on female academics and researchers.	Maxwell, N., Connolly, L., & Ní Laoire, C. (2018). Informality, Emotion and Gendered Career paths: the Hidden Toll of Maternity Leave on Female Academics and Researchers. Gender, Work & Organization, 26(2). https://doi.org/10.1111/gwao.12306	2018	Ireland	Gender, Work and Organization	UK	This article presents the findings of a qualitative study of the lived experiences of female academics and researchers in an Irish university. The analysis intrinsically links organizational structures and problems with the lived and felt dimensions of work.	Not reported	Feminist theory	Qualitative	Cross-sectional	Survey	43 women	Academy	No distinction	Not reported	Not reported	Questions were asked about their experiences before, during and after taking maternity leave	1) Maternity leave as a ‘burden’: shortcomings in how maternity leave is provided for in the university and, significantly, indicates heavy tolls on many of the women who took maternity leave during their academic career.; 2) Supported by colleagues but not by HoD [Head of Department]. No offer to provide assistance with workload during pregnancy; 3) difficulties attributed to the structural and …	along with the results	1) I experienced my immediate work environment as supportive. Having suffered severely during my pregnancies with illness [details omitted to protect anonymity], my immediate line managers did their best to alleviate any anxiety I felt and tried to put in place supportive structures 2) great flexibility for my work hours	Not reported	Not reported
18	Job mobility and the great recession: Wage consequences by gender and parenthood	Cha, Y. (2014). Job Mobility and the Great Recession: Wage Consequences by Gender and Parenhood. Sociological Science, 1, 159–177. https://doi.org/10.15195/v1.a12	2014	South Korea	Sociological Science	USA	1) study examines whether inter-organizational mobility affects men’s and women’s wages differently while paying close attention to the effect of parenthood on mobility outcomes, given that much of the gender wage gap is attributable to the lower wages of mothers 2) to examine whether and how macroeconomic conditions affect gender-specific mobility outcomes.	1) I expect that, in line with previous studies, employer changes for the sake of improving one’s job situation lead to earnings growth, whereas losing a job for economic reasons, such as layoffs or displacement, or quitting a job for non-work-related reasons are associated with earnings losses for both men and women upon reemployment. 2) within a single type of mobility, I expect that earnings g…	Not reported	Quantitative	Longitudinal	Survey	My analyses draw on data from the 2004 and 2008 panels of the Survey of Income and Program Participation (SIPP; U.S. Census Bureau / National Bureau of Economic Research), a national longitudinal household survey conducted by the U.S. Census Bureau.	Not reported	No distinction	Not reported	Not reported	not reported	1) The effect of job mobility on men’s and women’s earnings in pre-recession years: a) The estimated effects of the mobility variables show that for both men and women, employer changes for job-related reasons result in earnings growth, whereas employer changes resulting from layoffs or other personal or family-related reasons lead to earnings losses. These effects, however, also reveal interesti…	The wage returns to job-related quitting also decreased for mothers of children between six and 18. Put simply, the economic recession flattens out women’s wages across parental status, not by eliminating the penalties experienced by mothers of children under six, but by eliminating the wage premiums enjoyed by childless women and women with older children. The sensitivity to economic conditions …	Not reported	Not reported	Not reported
19	Managers' views on employees' parental leave: Problems and solutions within different institutional logics.	Nordberg, T. H. (2019). Managers’ views on employees’ parental leave: Problems and solutions within different institutional logics. Acta Sociologica, 62(1), 81-95. https://doi.org/10.1177/0001699318759781	2019	Norway	Acta Sociologica	Norway / United Kingdom (?)	The aim here is to analyse how managers approach employees’ parental leave within different institutional logics and how their approach relates to gendered norms of good parenthood.	Not reported	Not reported	Qualitative	Cross-sectional	Interview	34 managers in the police and the legal profession. The managers were either partners in private law firms or departmental heads in the police or public sector law offices	Organization	Police	Semi-structured, hour-long interviews. The managers were asked about their experiences with parental leave, potential challenges, and how such leave was handled from a practical perspective. The emphasis was on obtaining descriptions and examples. Managers can sometimes be reluctant to problematise parental leave in interview situations; however, that was not the case here.	Not reported	Main themes from the interviews. These were: 1. An overview of the organisation’s work (goals, duties, working hours, professional expectations). 2. Employees, family policies and work (parental leave in the organisation). 3. Career paths and promotions (career progression, goals and subsequent expectations for employees). 4. Parenthood and career progression (possible tensions).	Private firms: work is individualised, so are the consequences of parental leave. - "…this isn’t a system like in the public sector where you can just return and demand to move up in the hierarchy even though you’ve been away […] We make a living from selling our services. And if you choose to be absent for a year, nobody will deny you that, but you will return to a worse market position"; - "All…	along with the results	Public sector	Being absent is understood as an individual risk in a context where the competence of individual lawyers is measured by the presence of perishable client networks and earnings. the good parenthood norms reflected in common Norwegian parental leave practices, where the leave is used in full and mostly by women, also influence the managers’ views. These norms become apparent when the perceived solu…	This article shows the importance of contextualising professional logic within concrete workplaces. The contrast between how goals, strategies and required competence are understood in the different organisations suggests that the individualisation of work, and how the nature of the work is understood, are important when it comes to how parental leave is approached by managers. In occupations tha…
20	Motherhood and academic careers in Indonesia	Toyibah, D. (2019). Motherhood and academic careers in Indonesia. Pertanika Journal of Social Sciences & Humanities, 27(2), 1753-67. https://repository.uinjkt.ac.id/dspace/handle/123456789/54562	2019	Indonesia	Pertanika Journal of Social Sciences & Humanities	Malaysia	This article discusses how female academics in Indonesia balance motherhood to their careers. This study, therefore, aims to fill the gaps in the literature by exploring women’s experiences in balancing their motherhood role and academic career.	Not reported	Not reported	Qualitative	Cross-sectional	Interview	15 participants from two notable state universities in Jakarta / academic staff members / 40-50 years old and they generally occupy middle or senior positions	Academy	No distinction	There were at least three topics for the interview: first, the influence of culture, norm, and religious belief for motherhood and family life, second, experience and perception on academic career in comparison to other careers such as how they start and choose their careers, third, perception and experience on motherhood penalty and women as secondary earners.	not reported	1. Perceptions on Religious Values, Motherhood and Domestic Role 2. Academic Careers as an Ideal Career for Women in Indonesia 3. Perception on Motherhood Penalty and Women as Secondary Earners	1. Perceptions on Religious Values, Motherhood and Domestic Role - Women’s expectations concerning their position in the family indicates the need to adjust modern aspirations to accommodate the religious values they adhere to. It is imperative for them to obtain the husband’s consent in pursuing their career. - Struggle to convince her husband that she remained a good wife and mother - Informant…	Female academic struggle in negotiating their beliefs concerning their rights of participating in career development. Religious and cultural values control them, both individually and socially. Even so, most female academics accept these restraints, which may be regarded as obstacles to the advancement of one’s academic career including the traditional division of labour and motherhood, and they …	Not reported	Traditional gender relationships / religion	Not reported
21	Motherhood and its impact on career progression	McIntosh, B., McQuaid, R., Munro, A., & Dabir‐Alai, P. (2012). Motherhood and its impact on career progression. Gender in Management: an international journal, 27(5), 346-364. https://doi.org/10.1108/17542411211252651	2012	United Kingdom	Gender in Management: an international journal	United Kingdom	This paper is concerned with examining the impact of motherhood and its cumulative affect on women’s short and long-term career progression	Not reported	Not reported	Quantitative	Longitudinal	Survey	46,565 registered nurses in the NHS from the start of October 2000 to the end of September 2008. The data analysed included all registered nursing grades from entry level (Whitley council grade “D”) to the most senior (grade “I”) in both full-time and part-time employment.	Organization	Nursing	Impact of gender, working hour differentials, age of youngest dependent child upon employment grade (used as a proxy for career progression), length of service and retention. - Nurses with children (we refer to dependent children, requiring childcare responsibilities, as “children”) are categorised by the age of their youngest child Secondary database: Scottish workforce database, supplied by the…	not reported	not reported	- the higher the grade the less likely women are to have (dependent) children - The higher the grade, the older the youngest child **Mulheres com filhos, especialmente aquelas com filhos menores de 12 anos, eram mais comuns nos cargos mais baixos. - Women with children under five years of age are more likely to hold lower graded posts. - Once the child reaches secondary school age women’s career …	Part-time working is clearly linked to lower graded posts and women with children. That the price of reconciling part-time working and families is paid by women in terms of their career position. Women’s career positions are thus defined by two factors: the age of the children and the hours they work gender, the age of the child and the hours worked influence a person’s opportunities in relation …	Not reported	Part-time working Career breaks Dependent Children / age	The standard comparator in relation to women’s relative disadvantage in career progression does not fully convey the variations in the degree of disadvantage faced by women with children because this group is aggregated into a homogenous group, whereas in reality they are diverse group with complex constituencies. The degree of detrimental impact is directly proportional to the age of the child. …
22	Mothers' long-run career patterns after first birth	Frühwirth-Schnatter, S., Pamminger, C., Weber, A., & Winter-Ebmer, R. (2016). Mothers' long-run career patterns after first birth. Journal of the Royal Statistical Society Series A: Statistics in Society, 179(3), 707-725. https://doi.org/10.1111/rssa.12151	2016	Austria	Journal of the Royal Statistical Society Series A: Statistics in Society	United Kingdom	1. identify specific career patterns that characterize the employment and earnings paths of mothers after the birth of their first child. 2. Our second goal is to find out whether characteristics of the mother are associated with the type of career pattern that she follows after the birth of her first child.	Not reported	Not reported	Quantitative	Longitudinal	Survey	231095 female workers (todas mães) - employed for at least 100 days in the last year before giving birth; - births between 1990 and 2000; - age between 16 and 35 years old	Organization	No distinction	- Austrian Social Security Database (longitudinal information on employment and earnings of all private sector workers in Austria since 1972); - Time series of their employment and earnings status: ‘K’ (parental leave following childbirth); ‘0’ (economic inactivity with zero labour earnings); - Employment spells: employment at low monthly earnings/part-time work (category ‘1’), medium earnings em…	not reported	not reported	Analysing career mobility patterns in five clusters: - Low wage: 20% of the sample. Women in this group return to employment from maternity leave and transition into lower earnings categories (part-time jobs or low wage full-time jobs). Relatively high rate of return to maternity leave from employment, indicating multiple maternity breaks. - Late return: 28% of the sample. Extended maternity brea…	The outcomes after the birth of a child are enormously heterogeneous. The birth of a child is potentially a temporary interruption in the mother’s post-birth career path. This is reassuring as it allows abstracting from the particular institutional setting in Austria which provides generous family transfers and is characterized by prolonged periods of parental leave after birth. As long as the pa…	Not reported	Not reported	The impact of motherhood is very heterogeneous, and largely depends on the characteristics of the mother and her career (age, training, work) and the country's context/policies. This study, for example, was carried out in a country with extended maternity/paternity leave.
23	Never the right time: maternity planning alongside a science career in academia	Eren, E. (2022). Never the right time: maternity planning alongside a science career in academia. Journal of Gender Studies, 31(1), 136-147. https://doi.org/10.1080/09589236.2020.1858765	2022	Ireland	Journal of Gender Studies	United Kingdom	In this study, I focused on the lived experiences and perspectives of women in higher education (either as students or academics) in the field of physics and the physical sciences at Dublin universities	Q: How do female researchers and students in the field of physics and the physical sciences in higher education evaluate maternity, parenting, and parental leave based on their scientific discipline and gender identity?	Critical feminist theoretical framework	Qualitative	Cross-sectional	Interview	15 female five undergraduate (Bachelor of Science) students, five PhD students and five postdoctoral researchers (enrolled in physics and physical sciences departments at four Dublin universities). ages ranged from 18 to 40. Not all of them were parents or parent-to-be. Two mothers (one of them was a single mother). None ofthem reported pregnancy at the time of interview.	Academia	STEM	Not reported	Not reported	(1) unclear maternity leave policies; (2) balancing motherhood and academic science;(3) genderedparenthood;(4)instability; 5)Pandora’sbox:Mia’sexperience.	(1) Unclear maternity leave practices: - "when you don’t have proper maternity leave and good childcare, it makes people dropout because they canjust get an easier job which is not so demanding on all their time". - Instability/uncertainty around the postdoctoral position: women were welcomed to attempt to progress in academic science, but that they were not supported once there. - People can get…	- even the youngest participants expressed concerns regarding the possibility of combining children with optimal career progression. - instability and the prospect of parental responsibilities seemed to affect future career choice - Participants were often reluctant to pursue academic science careers due to the use of temporary contracts and the consequent instability. - traditional gender role b…	- role models (female professors who had done well in balancing work and family)	- issues of pressure to publish, a scarcity of role models, lack of job stability/use of short-term contracts, vague policies around parental leave, work-life balance and disparities between the respective expectations of men and women in terms of child-care and parental responsibilities. - Unclear maternity leave practices in academic career; - Pressure to publish: struggling with having the tim…	The solution to the unclear policies should come from the government rather than individual universities; Na carreira acadêmica: maternity leave was a significant gap in the research process that interrupted women’s publication record and ultimately destroyed their academic career. - The key to solving this is for academic institutions to establish policies for early career researchers which enco…
24	Normative discrimination and the motherhood penalty	Benard, S., & Correll, S. J. (2010). Normative discrimination and the motherhood penalty. Gender & Society, 24(5), 616-646. https://doi.org/10.1177/0891243210383142	2010	USA	Gender & Society	USA	This article builds on status discrimination research by examining reactions to mothers who challenge these stereotypes by providing overwhelming evidence of their competence and commitment.	We predict that when information about competence and commitment is moderately ambiguous, mothers will experience status discrimination. We expect that evaluators will view mothers as less competent and committed than other types of employees and offer them fewer organizational rewards. We expect that when mothers are portrayed as unambiguously high performing, evaluators will concede that mother…	Theories of prescriptive stereotyping	Quantitative	Experimental	Survey	260 (105 male, 154 female, and 1 not specified) undergraduates at a private university in the northeast.	Academy	No distinction	- “initial impressions survey”: competence measures, free-response “pros and cons” section - “Interpersonal Skills Evaluation,”: interpersonal hostility and likability measures. - “Applicant Evaluation Sheet,”: measure of commitment, the ability standards measures, and the organizational reward measures - Measures designed to measure their task orientation and evaluation criteria. Participants we…	laboratory study: participants evaluated a pair of job applications for a midlevel marketing job. The study manipulated applicant sex category (male or female), parental status (parent or nonparent), and level of ambiguity of past workplace performance. - 1st condition; setting of low ambiguity: glowing past performance review in the applicants’ files. - 2nd condition: setting of moderate ambigui…	not reported	Moderate Ambiguity: - mothers were rated as significantly less competent than nonmothers and fathers and significantly less committed than nonmothers; - mothers were not penalized on warmth, likability, or hostility. - Mothers were significantly less likely to be recommended for hire and offered marginally significantly lower starting salaries. - mothers experience status-based discrimination und…	-for men in professional occupations, fatherhood is perceived as a signal of positive interpersonal qualities (Coltrane 2004). - when performance information is moderately ambiguous: Male and female participants rated mothers as less competent and committed, held them to stricter standards, and penalized them on organizational rewards. - Low performance ambiguity: female participants evaluated su…	Not reported	women experience “penalties for success” in traditionally masculine-typed jobs	- mothers who perform very well are more penalized by other women because of interpersonal qualities than because of their competence and commitment to work. (evidence of workplace success will not eliminate discrimination but alter its mechanism) - mothers need to perform better than fathers to have good evaluations: recommend objective performance evaluations to support promotions, which take i…
25	On the bright side of motherhood—A mixed method enquiry	Ma, E., Kim, M. S., Yang, W., Wu, L., & Xu, S. T. (2022). On the bright side of motherhood—A mixed method enquiry. Annals of Tourism Research, 92, 103350. https://doi.org/10.1016/j.annals.2022.103350	2022	USA	Annals of Tourism Research	United Kingdom	our study aims to find out if motherhood, as a critical life stage and time of transition, may unlock hidden potential for working mothers, and help develop skills and capacities that are transferable to the workplace, leading to positive work and career related outcomes. In particular, the study has three objectives: (1) to explore and identify how motherhood experience may bring in positive cha…	not reported	Stress coping theory	Mixed-methods	Cross-sectional	Interview	17 working mothers	Organization	Tourism and Hospitality	Semi-structured in-depth interviews were performed with tourism and hospitality working mothers to identify key abilities and skills they acquired during motherhood as a result of coping with new challenges in life and work. Questions such as What skills and capacity did you develop in motherhood? What abilities and skills do you think are transferable in the workplace? Do you have more confidenc…	Not reported	1. Unlocked potentials (skills and capacity) while coping with motherhood challenges 2. Transferrable capacity/skills and perceived self-development & growth 3. Positive outlook on work and career-related outcomes	Literature review (study 1): - Positive impact of motherhood: Enhanced Psychological Well-being; Positive Changes in Identity and Self-perception; Positive Parenting Outcomes; Positive Workplace Experiences; Positive child-related outcomes; Positive organizational outcomes; Enhanced social relationships; - Predictors of positive results: Delaying motherhood and the number of children; Job charact…	- multiple skills, knowledge, and capacity can be enhanced or gained during motherhood as working mothers cope with the challenges of children, family, and work, supporting the stress coping theory; - Motherhood seems to be a good opportunity to train women's management skills and develop their leadership potential. - While motherhood may be perceived by some as career hindering (Burn, 2016), our…	- To enable working mothers to transfer these skills and capacities to the workplace, both tangible and intangible supports are needed. - Flexible hours, the option to work from home, opportunities to grow, mentorship programs, and jobs that offer values are also needed. - Working mothers need to believe in themselves and have a positive mindset when coping with challenges from both work and life.	Not reported	- Predictors of maternity positive results: Delaying motherhood and the number of children; Job characteristics (workplace autonomy and flexible work hours); Family and social support; higher personal identity, empathy, secured employment status, maternity leave packages, healthier spousal relationships, better financial status, and childbearing experiences. - formal or informal mentorship or par…
26	Outdoor Careers and Motherhood.	Whittington, A. (2019). Outdoor careers and motherhood. Journal of Experiential Education, 42(1), 79-92. https://doi.org/10.1177/1053825918820354	2019	USA	Journal of Experiential Education	United Kingdom	The purpose of this study was to examine (a) why women leave their AE/OE/EE career upon having children, (b) what challenges women working in AE/OE/EE face, (c) how women navigate family and an AE/OE/EE career, and (d) what strategies help women be more successful as working mothers.	not reported	Feminist research approach	Mixed-methods	Cross-sectional	Survey	83 women (35% are no longer working in an AE/OE/EE career; 65% currently working as an AE/ OE/EE professional)	Academy	Education	Descriptive questions included short answer questions such as “Did your career in AE/OE/EE impact your decisions when to have children?” Yes, no, and somewhat are reported using percentages. Qualitative questions were open-ended and often included a follow-up to the descriptive questions. For example, the above question was followed with “If so, how?” Open-ended questions were analyzed through op…	Not reported	1. Why Women Leave 2. Managing Family Life 3. Challenges for Working Mothers 4. Strategies/Support for Working Mothers	- Positive impact of motherhood: Enhanced Psychological Well-being; Positive Changes in Identity and Self-perception; Positive Parenting Outcomes; Positive Workplace Experiences; Positive child-related outcomes; Positive organizational outcomes; Enhanced social relationships;	- supportive spouses and extended family members who aided in child care; - Too many and inflexible work hours remains a major problem; - Flexible work hours, and the ability to change roles (for a period of time) without hurting one’s overall career trajectory, can contribute to success for working mothers; - Other factors that would help women maintain their profession is company policy that do…	sharing equal child care responsibilities, structure—the ability to plan and juggle duties and responsibilities and that partners supported their career choice	time away and feelings of guilt, stereotypical assumptions of motherhood, child care and poor salary compensation and breastfeeding.	longer maternity leave, more competitive salary, child care options for extended periods of time, partner aligned with career goals, company policy that does not require you to leave (if pregnant), being able to take leave without risk of losing position, family members close by, flexible hours, and more administrative work and less field work. Figuring out ways for women to alter their career re…
27	Parental leave vs. competition for clients: Motherhood penalty in competitive work environments	Halrynjo, S., & Mangset, M. (2022). Parental leave vs. competition for clients: Motherhood penalty in competitive work environments. Journal of Family Research, 34(3), 932-957. https://hdl.handle.net/11250/3047020	2022	Norway	Journal of Family Research	USA	Drawing on in-depth interviews with 30 women and men working in business banking, we explore how mothers and fathers experience market conditions in portfolio careers and how they navigate the individualized competition and the threat of losing clients, assignments, and bonuses if they use parental leave as it has been designed to be used in its national context.	not reported	Not reported	Qualitative	Cross-sectional	Interview	30 interviewees (15 women and 15 men) from five large companies in business banking and insurance. Twenty-six of the 30 interviewees had children.	Organization	Finance	The interviews lasted for approximately one hour and were based on an interview guide split into the four following predefined thematic parts: the interviewee’s own career; perception of the finance sector and own company; perception of the career paths of men and women in finance; and experience of combining a financial career with family life, including parental leave. The interviews can be cha…	Not reported	1. Parental leave in portfolio careers: Formal rights versus market mechanisms 2. Parental leave in portfolio careers: “Owning” and losing clients 3. Gendered use and consequences of leave 4. Parental leave and career in support functions and retail banking	- Predictors of positive results: Delaying motherhood and the number of children; Job characteristics (workplace autonomy and flexible work hours); Family and social support; higher personal identity, empathy, secured employment status, maternity leave packages, healthier spousal relationships, better financial status, childbearing experiences.	- Absence from work is specifically highlighted as a risk in portfolio careers where there is much to lose in terms of clients, bonuses, pay developments, and career opportunities. - This conflict is not due to opposition from management or colleagues but to the individualized competition driven by the rules of the market. - The more performance-based the pay, the higher the bonus and the higher …	Not reported	- Absence from work (parental leave) is a risk among portfolio workers, who have much to lose in the form of clients, bonuses, pay developments, and career opportunities. - work pressure and difficulty of managing both work and family.	hire a temporary worker to replace mothers on maternity leave; - Although performance-based pay seems to favor gender equality (as it is a more objective measure), depending on the area and working conditions it can increase inequality. Saying that each context/situation must be analyzed in detail when making the intervention (in this case it would be necessary to do something based on equity, no…
28	Parenthood Status and Compensation in Law Practice.	Reichman, N., & Sterling, J. (2013). Parenthood status and compensation in law practice. Indiana Journal of Global Legal Studies, 20(2), 1203-1222. https://doi.org/10.2979/indjglolegstu.20.2.1203	2013	USA	Indiana Journal of Global Legal Studies	USA	Do not speak clearly We begin our analysis by examining the relationship between parenthood and a range of independent variables, which were previously identified as factors that influence compensation decisions. The second part of the analysis looks specifically at the relationship between compensation and parenthood.	What is the relationship between parenthood status and lawyer compensation?	Status expectations theory	Quantitative	Longitudinal	Survey	2,890 lawyers (522 Mothers, 816 Fathers, 520 Women Without Children and 619 Men Without Children)	Organization	Lawyers	Second wave of data from the AJD study	Not reported	not reported	Orientation to work: - Women without children were more focused on their career development than men without children. - Most significantly, gender, not motherhood, explains the different group effects. Mothers and women without children rated lifestyle factors as more important to their decisions to take on their current jobs than fathers or men without children. Structure of work - Women, both …	- We did not find that parenthood status had a significant effect on credentials, orientation to work, or even to where lawyers actually practice law; - gender matters more - The primary effect for gender rather than parenthood status may be an artifact of the career and family stages of our respondents. If motherhood penalties accumulate as women bear more children, as some research suggests, we…	Not reported	Not reported	It suggests that: motherhood penalties accumulate as women bear more children (consider number of children, group of mothers is not homogeneous
29	Parity-specific motherhood penalties: Long-term impacts of childbirth on women's earnings in Japan	Hsu, C. H. (2021). Parity-specific motherhood penalties: Long-term impacts of childbirth on women’s earnings in Japan. Advances in Life Course Research, 50, 100435. https://doi.org/10.1016/j.alcr.2021.100435	2021	Germany	Advances in Life Course Research	Netherlands	This study contributes to the motherhood penalty literature by examining the long-term impacts (up to 10 years after childbirth) of the first and the second birth on women’s employment, work hours, wage rates, and earnings in Japan.	the current study would like to know: How long does the motherhood penalty persist? And whether working mothers can catch up with their pre-motherhood career track in later lives? I predict that motherhood earnings penalty in Japan is more likely to follow the cumulative disadvantage hypothesis, which predicts a long-term reduction in women’s earnings after childbirth without a sign of recovery. …	Human capital theory	Quantitative	Longitudinal	Survey	3358 women, among whom 902 had their first birth and 737 had their second birth during the observational period.	Not reported	No distinction	Our data came from 23 waves of the Japanese Panel Survey of Consumers (JPSC) (Japanese Panel Survey of Consumers, 2019), collected between 1993 and 2015. - Women’s employment was a dummy variable - Work hours were measured on a weekly basis and set to zero if the individual was not employed. - Earnings were also calculated on a weekly basis, measuring individual gross earnings before tax - Women’…	Not reported	not reported	Employment and work hours: - Japanese women’s employment rates declined around the time of first pregnancy. However, employment rates gradually recuperated to near the pre-pregnancy level after ten years. - Work hours decreased significantly shortly after the first birth. The declining curve of work hours has flattened afterward, remaining for ten years. - Birth in Japan affected women’s labor su…	- From a public policy perspective, significant motherhood penalties are especially harmful to aging and low-fertility societies like Japan because high opportunity costs of childbirth may discourage women’s fertility intention - It might also imply insufficient childrearing supports from public childcare institutes or male partners, both of which could suppress women’s labor supply in Japan - Wh…	Not reported	Not reported	- Comparing to married mothers, single mothers might face higher economic constraints in the absence of spousal income. This situation makes single mothers less likely to withdraw from the labor force upon childbirth because they are the only financial source of a household (Gangl & Ziefle 2009). - Moreover, married mothers are more likely to choose mother-friendly jobs and spend more time with t…
30	Perceived inequity, professional and personal fulfillment by women intensivists in France	Hauw-Berlemont, C., Aubron, C., Aissaoui, N., Bodet-Contentin, L., Boissier, F., Fartoukh, M. S., ... & FEMMIR Group for the SRLF Trial Group. (2021). Perceived inequity, professional and personal fulfillment by women intensivists in France. Annals of Intensive Care, 11(1), 72.	2021	France	Annals of Intensive Care	Germany	To know better what the real perception of professional and personal fulfilment in women intensivists was, we conducted a study to assess women intensivists’ quality of life at work and of personal life, as well as perception of gender equality at work and to identify measures that could help improving professional and personal fulfillment of this population.	not reported	Not reported	Quantitative	Cross-sectional	Survey	371 women intensivists	Organization	Medicine	41 questions, distributed into five main domains: demographics and private life characteristics, work position and activities, how being a woman intensivist impacts on career advancement and quality of life, perceived discrimination at work, suggestions to improve female intensivists work conditions. Twenty questions were yes–no ones, twenty items were evaluated on a 5-point Likert scale and one …	Not reported	not reported	Career advancement and quality of life - Although 43% of the respondents felt supported to conduct research, 31% considered that being a woman intensivist increased difficulties in academic and careers’ advancements. One third of the respondents (90/298) felt they had been disadvantaged because of their sex and declared that their work conditions would have been better being a man. - 21% of the r…	This workload, the risk of harassment and the feeling that working in intensive care is not compatible with motherhood reflect the hard work conditions in intensive care medicine and may partly explain the hesitation for young doctors to commit in this specialty in general.	Not reported	Not reported	Suggestions to improve women intensivists work conditions 1) adjusting working hours (including no planned meeting after 6 pm), but not necessarily working less and the possibility to work part-time when needed to allow a better balance between their personal and professional life; 2) increasing the number of intensivists per ICU, which would allow replacement of intensivists during maternity lea…
31	Practicing what we teach? An autobiographical reflection on navigating academia as a single mother.	Schlehofer, M. (2012). Practicing what we teach? An autobiographical reflection on navigating academia as a single mother. Journal of Community Psychology, 40(1), 112-128. https://doi.org/10.1002/jcop.20490	2012	USA	Journal of Community Psychology	USA	Using autobiographical narrative, I draw upon my own experiences as a single mother working in the academy to highlight women's acceptance and advancement in the academy.	not reported	Feminist theory	Qualitative	Case study	Interview	1 mulher acadêmica na área de psicologia	Academia	Psychology	Autobiographical narrative	Not reported	Not reported	- With a paucity of early career academics who are mothers to turn to (yet alone single mothers), I felt a sense of “other-ness” in academic circles. Instantly, my role as an emergent PhD became defined and identifiable as “the pregnant one”; 40 weeks later, “the one with the baby.” Expectant Mothers/Expectant Academics - I had internalized the aforementioned advice to postpone having a family in…	- Community psychologists have long recognized that gendered experiences influence and interact with many aspects of diversity, including not only parenting and marital status, but also race, culture, socioeconomic status, sexual orientation, and disability status, among others (Bond & Harrell, 2006). However, the field has struggled in translating a conceptual understanding of intersecting diver…	- Supportive Persons and Networks - our presence in the academy, as female scholars, might be increased by adopting a collaborative approach to our work. Taking a more collaborative, supportive approach in academia would allow the academy to be more inclusive, increasing women's voice and presence in the field.	- traditional model of academic work: much of academia as a culture remains rooted in traditional, male-dominated ideologies about the structure of work and the division of labor - the traditional academic interview process, like much of academic work itself, as structured under a model that assumes the prospective employee is either childless, or has a partner at home to manage familial tasks wh…	- The establishment of similar committees and forums within our professional organizations and academic institutions would further the advancement of women in academe. - Subtle changes in our supportive networks, such as specific committees and established institutions that promote women's development, can be of great benefit in advancing women in the academy. - forming explicit feminist or women…
32	"Stuck in the middle of what?": the pursuit of academic careers by mothers and non-mothers in higher education institutions in occupied Palestine.	El-Far, M. T., Sabella, A. R., & Vershinina, N. A. (2021). “Stuck in the middle of what?”: the pursuit of academic careers by mothers and non-mothers in higher education institutions in occupied Palestine. Higher Education, 81, 685-705.	2021	Palestine	Higher Education	Netherlands	In adopting the conceptual lens of ‘narratology’ (Boje 2001), and by using ‘narrative infrastructures’ (Deuten and Rip 2000) and ‘meta-conversations’ (Robichaud et al. 2004) as analytical tools, this study seeks to locate the narratives emerging from the micro-stories of day-to-day interaction told by academic mothers and non-mothers, and to show how these individual narratives are shaped by inst…	In this exploratory study, it is argued that, within higher education institutions, the ideology of motherhood influences both academic non-mothers and mothers. RQ: What role does motherhood play in shaping the academic careers of mothers and non-mothers?	Interpretative phenomenology	Qualitative	Case study	Interview	14 Palestinian women academics (divided equally between mothers and non-mothers)	Academia	No distinction	face-to-face phenomenological interviewing	Not reported	- The effect of ‘meta-narratives’: Patriarchy, religion, and politics - Laminating the individual narratives: The effect of motherhood on mothers and non-mothers - Who decides for women? Career and family-formation choices - Identity and career	The effect of ‘meta-narratives’: Patriarchy, religion, and politics - “…I often find myself unable to compete, especially that my family expects me to simultaneously, and independently, manage my domestic and career responsibilities.” - "We are typically excluded from posts that require us to invest additional time and effort away from home" - many Palestinian women find themselves obliged to ass…	- Grapevine’s comment appears to somewhat contradict the literature that views ‘family’ as a force that prevents women from advancing their careers and shaping their lives as they themselves envision, thus validating the findings of those prior studies that stress the importance of family support (Dickson 2020; Naz et al. 2017) - women ‘without’ children are also subject to family-related ‘burden…	- supportive role played by her spouse; - family encouragement and support; -	- discriminatory patriarchal and masculine norms; socially constructed ideologies and expectations of motherhood; - the on-going Israeli occupation (, the enduring occupation has discernibly obstructed all efforts aimed at improving the social and legal structures affecting Palestinian women and their rights); - family is found to be one of the most significant factors inhibiting mothers’ career …	- immediate family members (e.g., parents, siblings, spouses) may sometimes play an active role in supporting women’s educational and professional advancement (Dickson 2020; Naz et al. 2017). - pensar em como mudar dinâmica familiar - First, instead of attributing gender inequality at universities to unfair institutional practices, it would be essential to also account for the effect of the house…
33	The dual impact of gender and the influence of timing of parenthood on men's and women's career development: Longitudinal findings	Abele, A. E., & Spurk, D. (2011). The dual impact of gender and the influence of timing of parenthood on men’s and women’s career development: Longitudinal findings. International Journal of Behavioral Development, 35(3), 225-232. https://doi.org/10.1177/0165025411398181	2011	Germany	Journal of Behavioral Development	United Kingdom	The present research studied women’s and men’s career development specifically with respect to the transition from childlessness to parenthood.	Hypotheses were derived from the dual-impact model of gender and career-related processes. H1: mothers will reduce their work hours after the birth of a child, whereas fathers will not. H2: work hours predict objective career success for both men and women, but due to the higher variability in women’s work hours their influence on career success will be stronger for women than for men. H3: parent…	Dual-impact model on gender and career-related processes	Quantitative	Longitudinal	Survey	T1: 1,930 university graduates (825 women, 1,105 men; mean age: 27 years) T2: 1,397 participants responded to the second questionnaire (third: N = 1,330; fourth: N = 1,265; fifth: N = 1,225). 1,015 participants (428 women, 587 men; mean age M = 37.08, SD = 2.23) who had participated in all five waves. Professionals with university degrees from different fields of study	Organization	No distinction	- Sociodemographic data - Work hours (how many contractual hours they worked per week) - Gender self-concept: Personal Attributes Questionnaire (PAQ; Spence et al., 1974; German version Runge et al., 1981) - Objective career success: monthly income before taxes and by three variables assessing hierarchical status (permission to delegate work; temporary project responsibility; official leadership …	Not reported	Not reported	- H1: parenthood exerted a negative effect on women’s average work hours, and no effect on men’s average work hours - H2: The stronger influence of average work hours on women’s objective career success than on men’s objective career success is in line with Hypothesis 2 and reflects the larger variance in women’s than in men’s work hours - H3: average work hours were no mediator of men’s career s…	- Parenthood is a highly significant predictor of women’s work hours, and as work hours significantly predict objective success, parenthood is also a significant indirect predictor of women’s objective success. - Parenthood is no predictor for men’s work hours, and the impact of men’s work hours on objective success is weaker. - Discontinuous career patterns are a main reason for women’s lower ca…	- partner worked part time > less reduced work-hours	- Having first child soon after graduation - parenthood > reduced work hours > lower career success - Discontinuous career patterns - insufficient child-care facilities > reduced work hours when partner works full-time	- fathers also tended to reduce their workload more when they lived with a full-time employed partner. This could mean that if conditions allow (better income if partner works full time) or child-care responsibilities necessitate (partner has less time to take over child-care responsibilities if working full time) then fathers also are more prone to reduce their workload. (reduzir a desigualdade …
34	The “mommy track” in the workplace. Evidence from a large French firm	Lucifora, C., Meurs, D., & Villar, E. (2021). The “mommy track” in the workplace. Evidence from a large French firm. Labour Economics, 72, 102035. https://doi.org/10.1016/j.labeco.2021.102035	2021	Italy	Labour Economics	Netherlands	To analyze the motherhood penalty in the workplace we develop a difference-in-differences analysis in which we estimate changes in labour market outcomes for employees who experience the birth of the first child as compared to a group of childless co-workers.	How does the birth of the first child affect a woman’s earnings, as compared to her childless female co-workers? What is the main source of the wage penalty to mothers in the workplace? Is there an association between firms’ child-related leave policies and the motherhood penalty?	No distinction	Quantitative	Longitudinal	Survey	91,850 employee-year observations for the comparison group (employees who, during the whole period, never receive the treatment – i.e., they do not have any dependent children) and 7,126 employee-year observations for the treated group.	Organization	No distinction	12-year panel of confidential administrative data from a large manufacturing company in France. The data is drawn from different registers combining demographic, job, and workplace characteristics. Demographics include gender, age, marital status, number of dependent children, educational level, and place of residence. Job characteristics cover tenure, occupational category, sector of employment …	Not reported	Not reported	- employees’ earnings, for both mothers (fathers) and non-mothers (non-fathers), evolve in parallel until the occurrence of the event “birth of the first child”. - After childbirth, a significant drop in mothers’ earnings is observed, while there is virtually no, or slightly positive effect for fathers. - One year after childbirth, mothers experience a drop in total earnings of approximately 6%, …	- Most of these absences (up to 6 days for child-related reasons, and 2 days for child’s sickness) are remunerated at full salary, with little direct effect on earnings. Still, an increase in the number of hours of absences may have an impact on managers’ perception of a mother’s overall performance, and influence their assessment in terms career advancement decisions (Thomas, 2020). - the indire…	Not reported	Not reported	- for children aged zero to two, formal care in France include publicly subsidized home-based care, accredited family daycare providers, and nurseries. Free public pre-primary education comprehends pre-kindergarten when children are aged two, and kindergarten, the école maternelle, when they are aged three to five. - Most of the internal policies related to childcare needs are offered to mothers …
35	The Motherhood Penalty at Midlife: Long-Term Effects of Children on Women's Careers.	Kahn, J. R., García‐Manglano, J., & Bianchi, S. M. (2014). The motherhood penalty at midlife: Long‐term effects of children on women's careers. Journal of Marriage and Family, 76(1), 56-72. https://doi.org/10.1111/jomf.12086	2014	EUA	Journal of Marriage and Family	UK	In this study, we use data from the National Longitudinal Study of Young Women (NLS-YW; see http://www.bls.gov/nls/nlsorig.htm) to model the motherhood penalty over the course of women’s careers as they age through their 40s and into their early 50s—a time when virtually all women have finished bearing children and most have seen their children either leave the home or at least enter adolescence.…		Not reported	Quantitative	Longitudinal	Survey	4,730 women	Not reported	No distinction	Our dependent variables reflect three employment outcomes measured each year: (a) labor force participation, (b) hourly wages, and (c) occupational status. Key independent variables include the number of children ever born (or adopted), as reported at each interview. Measures of human capital include educational attainment, reflecting the highest level attained by a given year. We include measure…	Not reported	Not reported	- the number of children and age are both negatively associated with labor force participation - Labor force rates tend to rebound later in the life course, counterbalancing some of the earlier negative effects of children and of aging. - throughout the life course that higher parity is associated with lower employment rates, but the impact at all parities declines with age so that by the 40s, th…	- Children reduce labor force participation, but this effect is strongest when women are younger, in their 20s and 30s, when their children are younger too. - Later in life, as children age, there may be counter pressures for mothers to increase their labor supply to meet the financial needs of older children. - the wage penalty is actually relatively low in the 20s and peaks in the 30s for women…	Not reported	- Age - More than one child	Special focus on young/early career mothers
36	The Parity Penalty in Life Course Perspective: Motherhood and Occupational Status in 13 European Countries.	Abendroth, A.-K., Huffman, M. L., & Treas, J. (2014). The parity penalty in life course perspective: Motherhood and occupational status in 13 European countries. American Sociological Review, 79(5), 993–1014. https://doi.org/10.1177/0003122414545986	2014	Germany	American Sociological Review	USA	to explain the association between motherhood and occupational status developments over the life course	In this article, we ask if mother-hood is associated not merely with short-term costs but also long-run effects on occupa-tional status. We also explore the important question of whether women can mitigate the career costs of motherhood or whether state intervention is necessary Hypothesis 1: The motherhood penalty to occu- pational status will increase over a woman’s career (demand-side cumulati…	Motivated by a life course perspective on family dynamics and labor market outcomes, we draw on theories of human capital depreciation, occupational adjustment, and employer and institutionalized discrimination	Quantitative	Longitudinal	Survey	samples from the European Community and Household Panel (ECHP). The final sample analyzed contains 13,615 respondents. woman who work	Not reported	No distinction	we test our hypotheses with individual fixed-effects regression models	Not reported	Not reported	1) Motherhood and Occupational Status Developments: The first, second, and third births observed are each associated with a statistically significant decrease in occupational status of about one-half point. (...) Net of having a first, second, or third birth, age captures the underlying time trend and shows an upward occupational status trajectory for women without children. In short, at least fo…	- First, complementing research on the motherhood wage penalty, we find that moth- erhood exacts a cost in terms of women’s occupational status. At least for the first and second child, a birth depresses mothers’ occupational status trajectories compared to that of childless women. This suggests that the motherhood wage penalty is at least partly related to the fact that mothers’ occupational tra…	Not reported	Not reported	- Intervention through public policies focused on childcare, thus allowing for lesser occupational status losses for mothers. -the evidence suggests that the motherhood occupational status penalty is lower in Euro- pean countries where expenditures on public childcare are higher. Presumably, with public childcare, women have less need to switch to family-friendly, but lower status, occupations af…
37	The relationship between motherhood and professional advancement: Perceptions versus reality	Brown, L. (2010). The relationship between motherhood and professional advancement: Perceptions versus reality. Employee Relations. 32. 470-494. 10.1108/01425451011061649.	2010	USA	Employee Relations	UK	The purpose of this paper is to explore the perceptions and realities regarding professional advancement following motherhood	What are the perceptions versus realities of the relationship between motherhood and professional advancement?	Not reported	Mixed-methods	Cross-sectional	Survey and Interview	The sampling method included graduate students (who work full-time in a corporate setting) and professionals in business organizations geographically located in the eastern half of the USA. Industries included women in technology, marketing, public relations (PR), finance, accounting, healthcare, sales, insurance and government. -neither blue-collar, hourly wage earners nor administrative workers…	Organization	No distinction (technology, marketing, public relations (PR), finance, accounting, healthcare, sales, insurance and government)	-The paper utilized a survey with Likert-type options and open-ended questions - interview	Not reported	Elaborate on any of your survey answers. Comments about being a working mother. How does/does not your workplace support working mothers? How has/has not motherhood impacted your career and advancement?	- This original study suggests that women are leaving or slowing down in spite of family-friendly and flexible work options. - Results overview: Qualitative and quantitative findings that were consistent included those regarding work/family conflict, guilt and work as a priority following motherhood, overall individual job performance and perceived performance compared to non-mother female collea…	- The most significant finding in this study is development of a theory regarding personal career decisions women are making. Women tout and applaud employer policies and support of their advancement following motherhood, yet the data nevertheless reveal both subtle and overt discrimination by employers. While the women cite these career slow downs as personal decisions, they do not seem to reali…	Not reported	- As discussed, women perceive themselves and their situations differently than the actual experiences and behaviors reveal Differing perception from the reality of facts is a barrier to recognizing the impacts - or at least the intensity of the impacts)	- If family-friendly work-life balance policies were better integrated into corporate cultures, working mothers could continue to advance and contribute in meaningful ways to their organization rather than slowing down their upward mobility - Programs aimed at the retention and advancement of mothers' careers - Practices/workshops/lectures to sensitize leadership to motherhood - Policies that enc…
38	The Specter of Motherhood: Culture and the Production of Gendered Career Aspirations in Science and Engineering	Thébaud, S., & Taylor, C. J. (2021). The Specter of Motherhood: Culture and the Production of Gendered Career Aspirations in Science and Engineering. Gender & Society, 35(3), 395-421. https://doi.org/10.1177/08912432211006037	2021	USA	Gender & Society	USA	- Our study builds on these works by detailing (1) the content of cultural discourses about motherhood and (2) the social interactional pro- cesses by which these discourses circulate and shape career ambitions before individuals have children	Why are young women less likely than young men to persist in academic science and engineering?	Specter of motherhood	Qualitative	Cross-sectional	Interview	55 PhD students and 2 postdoc- toral scholars in natural sciences and engineering departments at four large classified universities. Three are private schools in the Northeast; the fourth is a public university on the West Coast -No respondents had children. - our sample includes women and men in a range of institutions and disciplines	Academia	STEM (geology, physics, horticulture, neuro-sciences, astronomy, chemistry, biological sciences, and engineering (materials, aerospace, mechanical, and electrical).	- All interviews were transcribed, and then coded and analyzed using ATLAS.ti and Excel	- our findings offer insights for institutions hoping to increase the percentage of women faculty in STEM. Because a larger presence of mothers could help dispel the specter of motherhood, policies that aim to recruit and retain them, such as tenure clock extensions that require par- ents to opt out rather than in, are necessary (proposta de intervenção) - But our work also reveals that intervent…	- We then asked about relationships (with advisors, committee members, other faculty, graduate stu- dents, and staff) and experiences, including collaboration, resources, social integration, career goals, and family plans. At the end, we asked about gender-related experiences (...) We concluded by asking questions about characteristics such as age, race/ethnicity, marital and parental status, and…	- Our data show that dominant narratives in academic science and engineering frame motherhood, but not fatherhood, in opposition to legitimacy as a scientist or engineer -For instance, participants expressed a common understanding that mothers are viewed as less hireable and that their work is held to a higher standard. - First, because it is widely assumed to be a career liability, motherhood is…	- We build on this work by showing how cultural beliefs about motherhood circulate in academic workplaces and shape the experiences and aspirations of potential mothers. - we extend previous work on gender inequality in academia by developing an account of how narratives and practices around motherhood disproportionately disadvantage young women and shape aspira-tions before they have children. -…	Not reported	- implicitly gendered assumptions about family responsibilities. - Male faculty also distanced themselves from, and disparaged, caregiving.	not reported
39	The toll of success: Female leaders in the "women‐friendly" Greek advertising agencies.	Miliopoulou, G. Z., & Kapareliotis, I. (2021). The toll of success: Female leaders in the “women-friendly” Greek advertising agencies. Gender, Work and Organization, 28(5), 1741–1765. https://doi.org/10.1111/gwao.12636	2021	Greece	Gender, Work and Organization	UK	- In this case, the key research question is exploratory, focusing on how female leaders experience gender and its intersection with age, national culture and corporate culture; and on the degree to which women can challenge male dominance.	Not reported	Intersectionality	Qualitative	Cross-sectional	Interview	- 12 senior women executives in Greek advertising agencies ‐ Were 45–54 years old, with two exceptions: one barely under 40 and one over 70. ‐ Worked for at least 15 years and held senior positions. ‐ Three worked in the creative department; 3 in the digital department; 1 in a PR department within an advertising agency; 1 in the financial department; and 4 in client services. The fact creatives w…	Organization	Advertising	interview guide was designed to explore beliefs and experiences, open in nature and neutral in language	- Even these experienced interviewees had little to propose for improvement, other than better legislation and more decent working hours: - Education can help. An institution for women‐managers; - Female leaders need to participate in formal or informal mentoring networks providing support and leading by example so that younger women realize that their burdens are not irreconcilable. - And policy…	- pink accounts; - homosociability; - and family issues; - whether creativity is a male attribute; - whether there are distinctive differences, inherent or acquired, between men and women regarding managerial skills; - how gender discrimination might cease to exist in Greek advertising and the Greek society. - Interviewers also collected demographic information and information on the numbers and …	- Single women mostly noticed discrimination in the workplace tracing four stereotypes: a) the bimbo: a good‐looking young woman trying to climb her way up whether using her charms or not; b) the bitch: a former bimbo now holding a senior position and abusing power; c) the hysteric: a woman in mid‐level management who loses her temper often; d) the mom who brings her problems at work. - Women are…	- Elaborating on the above claims, she noted that there is no investment in people or structures that will enable professionals to grow, educate them about their rights, or negotiate their claims. This leads to a lack of systematic help for mothers: - Most interviewees said there are no agency policies on gender equality and motherhood. -Successful senior women fully embody their managerial role,…	Not reported	- The findings indicate that a male dominated industry and a patriarchal socio‐cultural context -Looks individually at a problem that is collective -Because it is a research developed in Greece, Greek culture itself is a barrier	- Human Resources reinforcement in organizations - Leadership mentoring
40	Think Manager–Think Parent? Investigating the fatherhood advantage and the motherhood penalty using the Think Manager–Think Male paradigm	Morgenroth, T., Ryan, M. K., & Sønderlund, A. L. (2021). Think Manager–Think Parent? Investigating the fatherhood advantage and the motherhood penalty using the Think Manager–Think Male paradigm. Journal of Applied Social Psychology, 51(3), 237–247. https://doi.org/10.1111/JASP.12728	2021	UK	Journal of Applied Social Psychology	USA	testing how parenthood affects the TMTM asso-ciation, that is, the extent to which the stereotypes of fathers and mothers, compared to those of men and women in general, fit with leadership stereotypes.	Study 1 Hypothesis 1 Men, compared to women, will be rated as more similar to successful managers (TMTM). We will test this hypothesis both within gender, for women and men in general, and within parenthood, for mothers and fathers. Hypothesis 2 The TMTM association will be exacerbated for parents such that fathers will be rated as more similar to managers than men in general (the fatherhood adva…	Not reported	Quantitative	Longitudinal	Survey	The final sample was 326 (170 women, 155 men, and 1 did not in- dicate their gender) 329 U.S. American participants with at least 1 year of work experience were recruited on Mechanical Turk - The majority of our participants had some management experience (68.10%) and were employed in intermediate (51.54%) or senior (20.70%) positions. In terms of highest levels of educa- tion achieved, one parti…	Organization	No distinction	Schein Descriptive Index Study 2 Prolific website	Not reported	Not reported	- Female and male participants saw fathers, compared to men in general, as more similar to managers. - For ideal managers, we found no differences between female and male participants. - We replicated the TMTM association for descriptions of managers, such that women were seen as less similar to managers than men, and extended it to parents, where we found that mothers were seen as less similar t…	- Overall, the findings did not differ much between female and male participants. However, it appears that the motherhood advantage may be driven particularly by female participants. Moreover, we surprisingly found the basic TMTM association only among female participants. However, given that these findings were not consistent across the different manager conditions, these gendered patterns shoul…	- The way mothers are perceived that brings them closer to a leadership image.	- Gender-related stereotypes and also stereotypes related to motherhood and fatherhood	Not reported
41	What helps and what hinders? Exploring the role of workplace characteristics for parental leave use and its career consequences	Samtleben, C., Bringmann, J., Bünning, M., & Hipp, L. (2019). What helps and what hinders? Exploring the role of workplace characteristics for parental leave use and its career consequences. Social Sciences, 8(10). https://doi.org/10.3390/socsci8100270	2019	Germany	Social Sciences	Switzerland	The objective is not explicitly stated. - In this article, we assessed the role of workplace characteristics for fathers’ and mothers’ parental leave use and the perceived consequences of taking leave for their career advancement. - In this paper, we therefore examined how the workplace, which is a highly ”gendered organization” (Acker 1990), shapes fathers’ and mothers’ decisions on how to divid…	why do many fathers opt not to take (longer) parental leave? What role does the workplace context play for the duration of leave taken by both fathers and mothers? How does it relate to the question of whether fathers and mothers who take parental leave experience negative consequences for professional advancement?	Not reported	Mixed-methods	Cross-sectional	Survey and Interview	Quantitative -Our quantitative sample contains data from a national probability survey of different-sex couples with young children (N = 878 couples) - At least one of the parents had to be employed at the time of the interview to be included in the sample; moreover, unusual employment constellations (e.g., couples in which both partners worked part-time) were oversampled. - In our quantitative a…	Organization	No distinction	- we draw on survey data from a probability sample of different-sex couples with young children (N = 878), which were collected as an add-on to the AID:A II panel (“Aufwachsen in Deutschland: Alltagswelten”/“Growing up in Germany: Every-Day Worlds”). In this survey, respondents were asked detailed questions about workplace characteristics, such as their workplace culture or the availability and t…	Not reported	The interviewers followed an interview protocol that contained questions and stimuli on working conditions, work–family reconciliation, parental leave use, and the distributions of paid and unpaid work among couples.	- As is the case for fathers, replacement regulations were also relevant for mothers. The mothers who had a replacement had a 12% likelihood of taking less than twelve months of leave and a 48% likelihood taking more than twelve months. By contrast, the mothers who did not have a replacement had a 32% likelihood of taking less than twelve months of leave and only a 28% likelihood of taking more t…	- we highlight that general human resource practices such as staffing strategies may be more decisive for the parents’ uptake of parental leave than the availability of explicit family-friendly workplace policies. - As mothers reported, taking leave for twelve months or more is seen as relatively normal and unproblematic within the organization, as is hiring or finding a replacement (Aunkofer et …	Not reported	- communication - gender-related stereotypes - the presence of traditional gender norms - ideal worker	- human resoucers pratices -replacement - Parenting-focused leadership training
42	What Makes Single Mothers Expand or Reduce Employment?	Hancioglu, M., & Hartmann, B. (2014). What Makes Single Mothers Expand or Reduce Employment? Journal of Family and Economic Issues, 35(1), 27–39. https://doi.org/10.1007/s10834-013-9355-2	2014	Germany	Journal of Family and Economic Issues	USA	we examined factors influencing single mothers’ labor market participation over their life span.	We focused on the question of which individual factors and institutional circumstances influence single mothers expanding or reducing their labor supply.	Not reported	Quantitative	Longitudinal	Survey	Our sample consists of women aged younger than 60 years who were in single motherhood at some time during the panel period between 1984 and 2010 (N = 1,698)	Not reported	No distinction	Kaplan–Meier -Therefore we used competing risk regression that provides simultaneous analysis of transitions according to employment and family status. -semi-parametric proportional hazard models (Cox-regression)	- Probably, women that were full-time employed had made individual arrangements allowing full-time labor participation, or specific problems occurred that were independent from number of children, childcare or family status.	Not reported	2 Employment status before and in the first year of being single mother - As is evident in Table 2, 38.7 % of mothers were not employed one year before they became a single mother, while 29.4 % were employed full-time, approximately 24 % were employed part-time, and few mothers were in training or marginally employed. - we noticed that employment participation seems to be mostly unchanged, althou…	- Our descriptive results suggested that many women had to reduce their labor market participation shortly after becoming a single parent. - entry into single motherhood is characterized by accumulated difficulties regarding the compatibility of work and family life. However, single mothers appear to manage these problems over time - Compatibility problems still exist, but part-time employment se…	Not reported	- institutional chilcare - part time jobs (It is a facilitator for single mothers to return to the job market but a barrier to advancement) - Family-work compatibility - Timing of becoming a mother (from the 2000s onwards there was greater regularity in part-time work)	- Public policies aimed at maintaining mothers in the labor market, including compensation and support networks.
43	Why is there a gender wage gap according to occupational prestige?: An analysis of the gender wage gap by occupational prestige and family obligations in Sweden	Magnusson, C. (2010). Why is there a gender wage gap according to occupational prestige?: An analysis of the gender wage gap by occupational prestige and family obligations in Sweden. Acta Sociologica, 53(2), 99–117. https://doi.org/10.1177/0001699310365627	2010	Sweden	Acta Sociologica	United Kingdom	Investigate: (a) whether the gender gap in economic payoff to prestige differs across family status, and (b) whether women are less likely than men to have career-oriented jobs within occupational prestige categories, which in the end leads to lower wages for women.	(1) The gender wage gap, given the same attained occupational prestige, is expected to be larger between married/cohabiting men and women than between male and female singles. (2) The gender wage gap, given the same attained occupational prestige, is expected to be larger between married/cohabiting men and women with children than among childless married/cohabiting men and women. (3) A control of…	Not reported	Quantitative	Longitudinal	Survey	the sample is restricted to married/cohabiting respondents with children, which results in 1,714 respondents.	Not reported	No distinction	individual-level data from the Swedish Level-of-Living Survey	Not reported	Not Reported	-For all groups (all respondents in the pooled sample and for married/cohabiting respondents with children; singles and married/cohabiting childless respondents in the pooled sample), there is a significant gender difference in average hourly wages that is to women’s disadvantage. -The average wages are in general highest for married/cohabiting respondents with children for both men and women. -T…	- the gender wage gap is also larger between married/cohabiting men and women with children than between childless married/cohabiting men and women, which supports prediction 2: the gender wage gap given the same attained occupational prestige is expected to be larger between married/cohabiting men and women with children than among childless married/cohabiting men and women. In fact, the gender …	No reported	- children - primary responsibility for childcare	- HR policies focused on salary transparency - State oversight focused on salaries with attention to maternal disparities
44	Women coaches at top level: Looking back through the maze	Borrueco, M., Torregrossa, M., Pallarès, S., Vitali, F., & Ramis, Y. (2023). Women coaches at top level: Looking back through the maze. International Journal of Sports Science and Coaching, 18(2), 327–338. https://doi.org/10.1177/17479541221126614	2023	Spain	International Journal of Sports Science and Coaching	UK	objective of this study was to explore how women coaching in high-performance settings advanced through the ‘bottle-neck’ path	Not reported	Ecological-Intersectional Model and the Stages of Career Progression Model	Qualitative	Cross-sectional	Interview	13 women coaches from Southern Europe between the age of 28 and 46 years working in high-performance contexts (a) were working as head coaches or (b) had the highest level of coaching education and were involved in a technical staff but not as coaches.	Organization	Sport	The in-depth semi- structured interviews	- specific actions and policies towards the work–family conciliation. - national and international government bodies ought to develop actions to provide resources to advance on the professional- ization of women’s sport to answer the need of specific reg- ulations for women (e.g. support for motherhood), including mother coaches (e.g. support for the work– family conciliation), and the need of im…	(a) women’s background in sport, (b) how they were enticed into their first coaching roles, (c) experiences during the early stages of their careers, (d) how coaches progressed (or not) to high-performance envir- onments and experiences in their current positions, (e) aspects related to their tasks that influenced their wellbeing (f) reflections on the role of women in sports coaching.	- Participants suggest that having been an elite athlete and having connections with people in power positions facili- tate the progression (or not) to top level. Moreover, this pro- gression is hindered by the lack of role models and the lack of opportunities provided by sports organizations - Data analysis showed that sustaining top-level positions depends on women finding a way to generate suf…	- Findings in this study suggest that while there are individual and interpersonal factors sup- porting early career stages (i.e. entice and entry), once women coaches try to advance to professional coaching positions (i.e. engagement stage) the main path gets blurred and organizational and structural factors limit their progression, hindering their personal growth and forcing some women to choos…	- Parents and partners are the key agents providing this support at this moment of their trajectories.	-Travel for competition - Uncertainties about contract renewal	In this specific case, paternity leave or mandatory paternity leave.
45	Women in the German workplace: What facilitates or constrains their claims-making for career advancement?	Luekemann, L., & Abendroth, A.-K. (2018). Women in the German Workplace: What Facilitates or Constrains Their Claims-Making for Career Advancement? Social Sciences, 7(11), 214. https://doi.org/10.3390/socsci7110214	2018	Germany	Social Sciences	Switzerland	we investigate whether gendered claims-making, with women being less likely to make claims for career advancement, is largely dependent on whether workplace cultures support work–family balance or are highly demanding.	Questions: To what extent does claims-making for career advancement differ between men and women with and without children in the same workplace, and to what degree does it differ between workplaces depending on (a) work–family friendliness culture (support for reconciliation of work and family and high-demand workplace cultures), as well as (b) the gendered power structure, and (c) formalized pe…	Not reported	Quantitative	Longitudinal	Survey	3988 individuals from 121 work organizations.	Organization	No distinction	Not reported	Not reported	Not reported	1) organizational fixed-effects models on gendered claims-making: taking into account personal and job related characteristics on the individual level; being a woman with children in an average workplace decreases the likelihood of her making a claim by about 8.6%, as compared with men with children; mothers’ lower likelihood to pose claims is mainly driven by them working fewer hours (H! partial…	1) We found that men without children were most likely to make claims for career advancement and women with children were least likely to do so, when organizational characteristics are not considered. In these models, men with children and women without children did not differ significantly in their claims-making. For both men and women, parenthood rendered claims-making less likely, which is esp…	Women leading women	structural norms, cultures with strong tendencies to reproduce gender stereotypes and gender norms	Not reported
46	Women in tourism: gender (in)equalities in university teaching and research	Basurto-Barcia, J., & Ricaurte-Quijano, C. (2017). Women in tourism: gender (in)equalities in university teaching and research. Anatolia, 28(4), 567–581. https://doi.org/10.1080/13032917.2017.1370781	2017	Ecuador	Anatolia	UK	Aims to analyse the current situation of women in the academic field of tourism in four higher education institutions in Guayaquil and its surrounding area in the context of structural changes and policy actions that pro-mote gender equality in the Ecuadorian Constitution and law.	1) Specifically, we seek to look into open gender inequalities in tourism academia by measuring the percentage of women who hold teaching, research, and leadership positions 2) want to explore subtle inequalities in the workplace, through testimonies of female tourism academics regarding issues of access to academic jobs and leadership positions, sexism, work-life balance, career progression, and…	Not reported	Mixed-methods	Cross-sectional	Interview	9 (qualitative) 88 (quantitative)	Academia	Tourism and Hospitality	Interview	Not reported	The interviews aimed to collect oral testimonies that would allow us to understand the subtle forms of sexism (González-Suárez, 2002; Monroe et al., 2008), work-life balance (Merighi et al., 2011; Monroe et al., 2008; Small et al., 2011), gender stereotypes, and opportunities for career progression (López-Sáez, 1994; Valian, 2004) as perceived, identified, experienced, and recalled by female lect…	1) Sexism and discrimination in tourism academia: exist or discriminatory comments that have nothing to do with their ability to do their jobs or their pro-fessionalism for being mothers; 2) Work-life balance: testimonies reveal this to be something which worries mothers more than those participants who do not have children or family responsibilities. 3) Gender stereotypes and career progression:…	The very subtle nature of this discrimination, far from implying that it does not exist or that it is less prevalent than before, means that gender stereotypes (“There is no sexism”, “children are our responsibility as mothers”, “tourism is indeed a profession for women”) are so deeply ingrained that participants are either unaware of them or prefer not to complain. What is more, being aware of a…	No distinction	Stereotypes, sexism, discrimination, double burden, labor economy, fathers not helping mothers with housework, mothers being the sole caregivers for children, institutions and government perpetuating stereotypes of motherhood and undermining the strength and competence of mothers in the workplace.	Not reported
47	Women Scientists and Engineers in European Companies: Putting Motherhood under the Microscope.	Herman, C., Lewis, S., & Humbert, A. L. (2012). Women Scientists and Engineers in European Companies: Putting Motherhood under the Microscope. Gender, Work & Organization, 20(5), 467–478. https://doi.org/10.1111/j.1468-0432.2012.00596.x	2012	UK	Gender, Work & Organization	UK	hear women’s experience of motherhood in the workplace, at different stages of their lives and careers; investigate how this related to promotional practices, advancement and career aspirations; identify the strategies women employed to reconcile their experiences of being mothers with the imperatives of their workplace.	1) how women make sense and respond to professional and progression expectations in the context of motherhood; 2) the strategies they employ to address this double bind of profession and motherhood as well as the extent to which these responses/strategies are influenced by local context.	Not reported	Qualitative	Cross-sectional	Interview	24 mothers. The sampling procedure adopted was purposive in nature as we were looking for rich and interesting data.	Organization	STEM	semi-structured interview made by the researchers	Proposes intervention only in the discussion and conclusion.	The interview topics covered: career histories; decisions in the context of motherhood; and experiences relating to progression and promotion within the company. The interview also included an element looking at personal details and life stories of the participants. Our interviewees were encouraged to narrate aspects of their lives, including their studies and careers in the context of SET, as we…	1) ‘no longer one of the boys’: as taking maternity leave, many returned to work on a reduced hours contract and this, together with their new status as mothers often had an adverse effect on the way they perceived their progression opportunities. 2) Motherhood (rather than just gender) was widely believed to undermine career opportunities, either directly, via forms of discrimination, or indirec…	As the three workplaces are in the headquarters of the MNCs, corporate cultures and practices and national contexts are inevitably interlinked and both are reflected in the predominant motherhood and career strategies of our participants.	Our analysis revealed four broad strategies through which participants explained how they managed both motherhood and professional SET roles. We categorized the participants’ description of their strategies along two axes; namely, how far they resisted or replicated organizational cultures and how they articulated the strength of their career ambition and professional identity. These then led us …	1) their new status as mothers often had an adverse effect on the way they perceived their progression opportunities. 2) hegemonic masculine behaviour 3) undermine career opportunities 4) expectations of behaviour 5) discrimination 6) Unequal treatment between mothers and non-mothers 7) Predominantly male environment 8) Motherhood stereotypes were greater than gender stereotypes (it was not about…	Companies that have a culture that supports motherhood more, allowing leaving work earlier to take care of children, having a daycare, having a career mentorship program focused on mothers so that they take on leadership roles instead of perpetuating barriers that mothers would not have enough time and dedication to take on decision-making positions due to having a family.
48	Women's experiences with parenting during doctoral education: Impact on career trajectory	Mirick G., R., & Wladkowski P., S. (2020). Women’s Experiences with Parenting During Doctoral Education: Impact on Career Trajectory. International Journal of Doctoral Studies, 15, 089-110. https://doi.org/10.28945/4484	2020	USA	International Journal of Doctoral Studies	USA	This study explored the experiences of women doctoral students and their perceptions of the impact of this experience on their academic careers.	1. What family friendly supports are available? What family friendly supports do students wish were available? 2. How does having a child during a doctoral program impact doctoral student work? 3. How does having a child during a doctoral program impact career decisions after graduation?	Not reported	Mixed-methods	Cross-sectional	Survey	women doctoral students and graduates (N=777)	Academia	No distinction (social work, nursing, sociology, biology, computer science, English)	The researchers constructed a survey based on previous research on the topic of doctoral student motherhood. Open and closed ended questions asked about demographic and educational information, supports available and desired, and the impact of the experience on academic career. The survey was piloted with academics and revised according to feedback. Demographic and educational information The sur…	proposes in the conclusion: mentorship	Not reported	EXPERIENCES IN DOCTORAL PROGRAMS Table A1 reports the supports available to and desired by participants. The most common supports available were flexibility (57.1%), support from a doctoral peer (42.9%), support from a mentor (40.7%), and healthcare (42.3%). The most frequently desired supports were subsidized childcare (67.7%), paid leave (53.3%), childcare for evenings and weekends (48.3%), and…	1) women’s experiences with parenting as a doctoral student are not monolithic; instead, women have disparate, diverse experiences across programs, universities, mentors, and fields of study. 2) literature, family friendly policies were inconsistently available to women across programs. 3) The relationship between the availability of supports and the impact of having a child on career was inconsi…	A very small group (n=22) of participants believed that having a child positively impacted their academic careers. Some found that having children increased their motivation to complete their doctoral work and remain in academia.	1) Individual factors: percepção de menor qualificação, shift in career goals, shift in personal and professional priorities., impact on concept of ideal career. 2) Contextual factors: felt they had fewer opportunities for professional development (e.g. publications, research collaborations, conference presentations, teaching, post-doctoral fellowships) due to having a child. Some participants de…	(1)Training sessions and awareness-raising lectures on stereotypes and qualification for mother women; (2)University programs that contribute to the retention of mother women in postgraduate programs; (3) Academic legislation that contributes to necessary absences for mothers of newborns, greater flexibility in classes and assignments, as well as specific grants involving projects to better under…
49	Women's work interruptions and career prospects in Germany and Sweden.	Evertsson, M., & Grunow, D. (2012). Women’s work interruptions and career prospects in Germany and Sweden. International Journal of Sociology and Social Policy, 32(9/10), 561–575. https://doi.org/10.1108/01443331211257652	2012	Sweden	International Journal of Sociology and Social Policy	UK	focus on two welfare state regimes with differing degrees of de-familialisation strategies, Germany and Sweden, to study whether and how women’s career interruptions influence their labour market prospects. By comparing women with continuous careers to those with discontinuous careers due to: parental leave or homemaking; unemployment; or other reasons, the authors explore the support for the ski…	H1: The longer the accumulated family leave experience, the lower the chances of an upward occupational move in Sweden. For Germany, the accumulated family leave experience should have no or only a weak negative effect on women’s subsequent upward career mobility. H2: The longer the accumulated unemployment experience, the greater the risk of a downward move in Germany. For Sweden, accumulated un…	Human capital theory and the related skill depreciation hypothesis, and signalling theory.	Quantitative	Longitudinal	Survey	1.762 german women and 1.086 sweden women	Organization	No distinction	Not reported	Not reported	Nor reported	1) Many German women drop out of the labour force altogether at the birth of a child (i.e. resulting in fewer returners who have episodes with leave experience). 2) German women also have more experience of a career interruption for other reasons than family leave or unemployment. 3) that considerably fewer women in Germany have children under the age of three (at the start of a new job episode) …	Germany only recently implemented policies that include de-familialising elements while important familialistic policies, such as the joint taxation system, largely remain in place (Lister, 1994; Esping-Andersen, 1999). The results support hypothesis 1. The 2 hypothesis is partially supported. Whereas women in Germany have a higher risk of a downward move the longer their unemployment experience,…	Sweden is known for de-familialisation strategies and policies that facilitate for working mothers.	The relative inertia in the German system may, to some extent, work to the advantage of German women. When occupational mobility is less frequent, time out on family leave may be less detrimental to careers than in a system where occupational mobility is more common.	(1) Swedish women should try to limit the duration of their parental leave if they are unwilling to sacrifice career advancement. (2) German policy makers should be concerned about how to reduce the scarring effects of unemployment once women are back in paid work.
50	Working moms: Motherhood penalty or motherhood return?	Kelley, H., Galbraith, Q., & Strong, J. (2020). Working moms: Motherhood penalty or motherhood return? The Journal of Academic Librarianship, 46(1), 102075. https://doi.org/10.1016/j.acalib.2019.102075	2020	USA	The Journal of Academic Librarianship	Japan	To look at the differences in salary and other factors between mothers and non-mothers in academic libraries.	Questions: 1) Is there a significant wage gap between women who are mothers and women who are not, and what is the gender wage gap if compared between men and non-mothers? 2) whether we would see additional differences between mothers and non-mothers, including position and perceptions of well-being. Hypothesis: (1) Mothers would have lower salaries and be concentrated in lowe positions when comp…	Not reported	Quantitative	Cross-sectional	Survey	808	Academia	Library and information science	Produced by the authors: 1) Sociodemographic 2) Income and job position 3) Work-life balance, job satisfaction, and general happiness.	Not reported	Not reported	1) H1 não foi comprovada: mães actually had a higher mean salary than their childless counterparts and non-mothers even thought it was not significant (as mães eram relativamente mais velhas do que as não-mães). 2) utilizando regressão, mothers made 97.14% and non-mothers made 95.31% of what men made - disaggregating mothers did not lower the wage gap between non-mothers and men. 3) H3 no statist…	Our results contradict those perceptions by showing that women who are mothers work as many hours as their childless counterparts, have similar levels of job satisfaction, and may be less likely to seek external positions.	Childeren	The results did not present barriers as all hypotheses were refuted	Increased awareness of the potential advantages of hiring mothers may help neutralize many employers' negative perceptions, whether the perceptions are conscious or unconscious.
51	Working mothers in East and West Germany: a cluster analysis using a three-stage approach	Ziegler, Y., Graml, R., Khachatryan, K., & Uli, V. (2022). Working mothers in East and West Germany: a cluster analysis using a three-stage approach. Gender in Management: An International Journal, 37(3), 423–437. https://doi.org/10.1108/gm-10-2020-0318	2022	Germany	Gender in Management: An International Journal	UK	Analyze the impact of motherhood on female professional advancement in the specific national context of Germany. In addition, this study aims to present a unique perspective of the similarities and dissimilarities between the Western and Eastern parts of the country.	No distinction	Work–gender literature (Family vs career dichotomy, Demographics, partner support, employer support)	Quantitative	Cross-sectional	Survey	2,130 working mothers and adjusted for 1,879 working mothers	Academia	No distinction	Not reported	Not reported	Not reported	Análise de quadrantes: identified four types of working mothers: (1) Cluster 1: work-oriented mothers (20%); - east germany and berlin, high education, middle age, few children, leadership position, full-time job, original position after maternity and parental leave, both partners are equally responsible for income and family work, more than a fifth of the group state that their work–family balan…	1) In terms of biography, the analysis suggests that, compared to their Western counterparts, East German respondents are, on average, younger with fewer children. 2) career positioning, we observed close similarities between Clusters 1 (“work-oriented mothers”) and 4 (“strongly career-oriented mothers”), where middle- to advanced-age working mothers worked long hours in leadership or high-level …	Family and spousal support	Cultural and contextual (exceptionally comparing capitalist and former communist nation segments)	Government policies and cultural processes of how Brazil comprehends paid and unpaid work (lectures, workshops, flyers)
52	"You're a teacher you're a mother, you're a worker": Gender inequality during COVID‐19 in Ireland.	Clark, S., McGrane, A., Boyle, N., Joksimovic, N., Burke, L., Rock, N., & O’ Sullivan, K. (2021). “You’re a teacher you’re a mother, you’re a worker”: Gender inequality during COVID‐19 in Ireland. Gender, Work & Organization, 28(4). https://doi.org/10.1111/gwao.12611	2021	Irish	Gender, Work & Organization	UK	This study aims to understand the experience of working mothers who managed work and home duties during the COVID‐19 pandemic in Ireland.	Not reported	Phenomenological method of analysis (IPA)	Qualitative	Cross-sectional	Interview	30 working mothers	Not reported	No distinction	Not reported	No distinction	the experience of and the impact of the COVID‐19 pandemic on the family.	1) wellbeing: estresse, psychologycal burden 2) Experiences of negative emotions in the early stages of the pandemic: psychological stress, guilt, increased pressure, disconnectedness, and isolation; increased burden of childcare on women, mothers reported having higher rates of managing childcare provisions than their partners; lone mothers report greater financial instability, isolation, or dif…	Results and discussion were described together.	No distinction	The lack of family support and spousal assistance in household management (care economy), coupled with double or triple workloads, stress, and guilt impacting work performance, burdens, financial and psychological instability, societal expectations of womanhood and motherhood while attempting to balance a career.	This study contributes to a perspective that crises tend to disrupt advancements achieved over years among marginalized populations, leading them to subject themselves to positions of psychological vulnerability (stress, burden, fatigue) and financial vulnerability, to the extent that it directly affects their careers. Family support as well as support within the circle of friends, along with ext…
